1           **The Signature Microbiota Driving Rumen Function Shifts in Goat Kids**

2                                   **Introduced Solid Diet Regimes**

3

4 Xiaokang Lv<sup>1\*</sup>, Jianmin Chai<sup>12\*</sup>, Qiyu Diao<sup>1</sup>, Wenqin Huang<sup>1</sup>, Yimin Zhuang<sup>1</sup>,  
5 Naifeng Zhang<sup>1#</sup>

6

7 <sup>1</sup>Feed Research Institute, Chinese Academy of Agricultural Sciences, Key Laboratory of Feed

8 Biotechnology of the Ministry of Agriculture, Beijing 100081, China

9 <sup>2</sup>Department of Animal Science, Division of Agriculture, University of Arkansas, Fayetteville, AR,

10 72701, USA

11

12 Running title: signature associated with diet and rumen function

13

14 \* these authors contributed equally to this work.

15 **#Correspondence:**

16 Professor Naifeng Zhang, Email [zhangnaifeng@caas.cn](mailto:zhangnaifeng@caas.cn)

17 Postal address: No.12 Zhongguancun South St., Haidian District, Beijing, P.R.China

18 100081

19 Phone #: +86(10) 8210 6055

20 Fax #: +86(10) 6216 9105

21

## 22 **Abstract**

23       The feeding regime of early supplementary solid diet improved rumen  
24 development and ruminant production. However, the signature microbiota linking  
25 dietary regimes to rumen function shifts and hosts are still unclear. We analyzed the  
26 rumen microbiome and functions affected by supplementation of solid diet using a  
27 combination of machine learning algorithms. The volatile fatty acids (i.e., acetate,  
28 propionate and butyrate) fermented by microbes increased significantly in the  
29 supplementary solid diet groups. The predominant genera altered significantly from  
30 unclassified *Sphingobacteriaceae* (non-supplementary group) to *Prevotella*  
31 (supplementary solid diet groups) RandomForest classification model revealed  
32 signature microbiota for solid diet that positively correlated with macronutrient intake,  
33 and linearly increased with volatile fatty acids production. The nutrient specific  
34 bacteria for carbohydrate and protein were also identified. According to FishTaco  
35 analysis, a set of intersecting core species contributed with rumen function shifts by  
36 solid diet. The core community structures consisted of specific signature microbiota  
37 and their symbiotic partners are manipulated by extra nutrients from concentrate  
38 and/or forage, and then produce more volatile fatty acids to promote rumen  
39 development and functions eventually host development. Our study provides  
40 mechanism of microbiome governing by solid diet and highlights the signatures  
41 microbiota for animal health and production.

## 42 **Importance**

43 Small ruminants are essential protein sources for human, so keeping them health and

44 increasing their production are important. The microbial communities resided in  
45 rumen play key roles to convert fiber resources to human food. Moreover, rumen  
46 physiology experience huge changes after birth, and understanding its microbiome  
47 roles could provide insights for other species. Recently, our studies and others have  
48 shown that diet changed rumen microbial composition and goat performance. In this  
49 study, we identified core community structures that were affected by diet and  
50 associated to the rumen development and goat production. This outcome could  
51 potentially allow us to select specific microbiome to improve rumen physiology and  
52 functions, maintain host health and benefit animal production. Therefore, it gives a  
53 significant clue that core microbiome manipulation by feeding strategies can increase  
54 animal products. To our knowledge, we firstly used FishTaco for determination of  
55 link between signatures abundances and rumen function shifts.

56 **Keywords:** goats, rumen microbiota, solid diet, rumen development, neutral detergent  
57 fibers, volatile fatty acids

58

## 59 **Introduction**

60 With the development of next generation sequencing, the roles of gut  
61 microbiome have been dramatically understood. The early life diet, especially  
62 introduction of solid diet, is an important driver in shaping long-term and adult gut  
63 microbiome profiles due to the novel alteration of diet components and macronutrient  
64 levels as well as gut anatomical development (1). Goat with rapid physiological  
65 changes (non-rumination, transition and rumination) could be proposed as an  
66 appropriate animal model for studying the gut microbial ecosystems development by  
67 early diet intervention and providing a means for prevention of metabolic diseases (2,  
68 3). Young ruminants receiving only milk or fluid diet (milk replacer) have limited  
69 metabolic activity in the rumen epithelium and minimal absorption of volatile fatty  
70 acids (VFA) (4). Early supplementary feeding solid diet has been widely used in lamb  
71 production to improve rumen and body development since it can stimulate microbial  
72 proliferation and VFA production that initiates epithelial development (5). A solid  
73 concentrate diet (starter) containing high concentration of carbohydrate has been  
74 widely used to rear pre-weaned ruminants (4, 6, 7). Compared with breast milk-fed  
75 lambs, the community structure and composition of rumen microbiota of started-fed  
76 lambs tends to mature easily and quickly (8). Lin and their colleagues (3) analyzed  
77 rumen microbiota in lambs fed starter vs breast-milk. They found that acetate and  
78 butyrate increased in starter-feeding lambs, as well as increases of 5 genera including  
79 *Mitsuokella*, *Sharpea*, *Megasphaera*, *Dialiste*, and unclassified *Bifidobacteriaceae*.  
80 An extra alfalfa supplementation on the basis of concentrate diets improves rumen

81 development to the next level. Previous studies reported that increases of growth  
82 performance and changes of ruminal microbiota during the pre- and post-weaning  
83 periods were found in lambs fed starter plus alfalfa compared with lambs fed  
84 fluid-diet and starter (9, 10). In addition, some studies have summarized the  
85 significant changes of microbiota in solid feeding regime and evenly calculated the  
86 correlation between macronutrient intake and rumen bacterial abundances. Wang et al.  
87 (11) found the correlation between bacterial genera in lambs rumen tissue and  
88 functional variables at d42. Yang et al. (10) sequenced rumen samples from *Hu* lambs  
89 fed milk replacer from d5 to d38 and supplied with solid diet (starter and alfalfa).  
90 They observed the effect of solid diet on microbial composition, and a set of taxon  
91 correlated with CP, NDF and body weight.

92       Until now, although these studies remarkably extend the effects of solid diet on  
93 the development of rumen functions and microbial communities in lambs, they mainly  
94 focus on the microbiota at weaning day (around d 40) or at genus level. Many key  
95 questions remain unclear. For example, does goat kids have similar pattern by solid  
96 diet since lambs and goats belong to different genus? What are the signature  
97 microbiota for supplementary regimes? How does the regime supplemented starter  
98 plus alfalfa affect rumen microbiota manipulation? How does the signature microbiota  
99 associated with other members in solid diet regime maintain equilibrium and improve  
100 function? To address these questions, a study that feeds goats with solid supplement  
101 to investigate microbiome and their association with experimental factor and rumen  
102 function using more machine leaning algorithms is urgent. RandomForest, an

103 ensemble learning method for classification and regression, can be used to rank the  
104 importance of predictor variables in a regression or classification problem in a natural  
105 way (12). FishTaco, a computational framework for comprehensively computing  
106 taxon-level contribution to detected functional shifts and identifying key taxa, was  
107 introduced by (13). Network analysis that identify the microbial interaction allows us  
108 to characterize how the “core” microbiota impacts the overall composition and  
109 function (14).

110 Therefore, the objectives of this work was to assess the rumen fermentation,  
111 microbiome community and function shift influenced by supplementary solid diet fed  
112 until to d 60 (rumination phase). We addressed above questions by deeply analysis of  
113 microbial data with a combination of above three algorithms. Also, the correlation  
114 between phenotype, such as macronutrients intake and rumen fermentation  
115 parameters, and microbiome were identified. We observed that extra solid diet intake  
116 in early life could change the rumen microbial community structure towards  
117 matured level by increasing signature microbiota qualitatively or quantitatively, and  
118 then fermentation environment and functions.

119

## 120 **Results**

### 121 **Rumen fermentation parameters**

122 The rumen fermentation parameters affected by the different dietary regimes  
123 were observed (Figure 1 & Table S3). The MRO group had greater concentration of  
124  $\text{NH}_3\text{-N}$  ( $P<0.05$ ) compared with the MRC and MCA group, while the opposite pattern

125 of ruminal microbial protein was found. The more concentration of total VFA, acetate,  
126 propionate, butyrate and valerate in supplementary solid diet regimes (MRC, MCA)  
127 as compared with MRO was observed ( $P<0.05$ ), and except propionate and valerate,  
128 the acetate, butyrate and Total VFA were higher in MCA than MRC ( $P<0.05$ ).

129 Since the key factors of diets influenced goat rumen environment and  
130 development were intake of nutrient including CP, NFC and NDF, thus, correlation  
131 between nutrient intake and rumen fermentation parameters was performed (Table S4).  
132 Regression analysis confirmed that pH and  $\text{NH}_3\text{-N}$  were negatively associated with  
133 average daily intake of CP, NFC and NDF, while rumen MCP and VFA (i.e., acetate,  
134 propionate, butyrate, and Total VFA) concentration had the strongly positive  
135 association with nutrient intake.

136

### 137 **The diversity and core bacteria in rumen microbiome**

138 After quality control, filtering, and OTUs clustering steps, 64,1197 high quality  
139 sequencing reads across all samples and an average of 3,5622 sequence reads for each  
140 sample were generated. Firstly, we analyzed all the rumen content microbiome at  
141 community level. Although diversity (Shannon Index) was not different ( $p=0.372$ ),  
142 significance of microbial richness was observed among MRO, MRC and MCA rumen  
143 samples ( $p=0.012$ ) (Figure 2 A&B). The MRO rumen microbiota had significantly  
144 higher observed species than both MRC and MCA samples ( $p=0.045$ ,  $p=0.005$ ), and  
145 there was no difference between MRC and MCA ( $p=0.180$ ). The observed species of  
146 rumen microbiome was negatively correlated with nutrient average daily intake

147 including CP ( $r=-0.65$ ,  $p=0.003$ ), NFC( $r=-0.73$ ,  $p=0.001$ ) and NDF ( $r=-0.74$ ,  
148  $p=0.0003$ ) (Table S5). Negative association between microbial richness and MCP and  
149 VFA including acetate, propionate, butyrate, valerate and Total VFA was also  
150 observed. Regarding the beta diversity measurements, significant cluster in  
151 community structure among 3 regimes were detected (Weighted Unifrac ANOSIM,  
152  $R=0.68$ ,  $P<0.05$ ; UnWeighted Unifrac ANOSIM,  $R=0.69$ ,  $P=0.001$ ). The MRO  
153 formed a distinct cluster (green dots) on the left side, while the MRC and MCA were  
154 closely clustered (red and blue dots) on the right side of PCoA plot (Figure 2 C&D).

155 We next examined the rumen core microbiome among three treatments. At genus  
156 level, a total of 152 genera were observed, and *Prevotella* followed by unclassified  
157 *Prevotellaceae*, unclassified *Sphingobacteriaceae* and unclassified *Bacteroidetes*  
158 accounted for 63.29% of the total sequences were the predominant genera with  
159 abundance over 5% across all samples(Figure S1). The top genera in MRO were  
160 unclassified *Sphingobacteriaceae* (30.32%), unclassified *Prevotellaceae* (16.92%),  
161 unclassified *Bacteroidetes* (11.77%) and *Prevotella* (8.91%). In MRC, *Prevotella*  
162 (56.02%) were the predominant bacteria, followed by *Roseburia* (4.49%), unclassified  
163 *Prevotellaceae* (4.29%), *Selenomonas* (3.82%) and unclassified *Lachnospiraceae*  
164 (3.73%). However, in MCA, the abundance of the predominant genus *Prevotella*  
165 (44.02%) decreased compared with MRC, and other dominant genera were  
166 unclassified *Prevotellaceae* (11.63%), *Fibrobacter* (7.01%), *Treponema* (5.35%),  
167 *Succinivibrio* (4.74%) and unclassified *Lachnospiraceae* (4.50%)

168 At OTU level, there were 281 OTUs that were significantly different between 3



169 groups (Table S6), and 16 taxa in top 30 were significant. The top 30 most abundant  
170 bacterial taxa accounting 57.77% of all reads are displayed on stacked bar charts  
171 (Figure 3). Among top 30 OTUs, 14 belong to genus *Prevotella*, and 4 was owned by  
172 genus unclassified *Prevotellaceae*. The OTUs belong to unclassified  
173 *Sphingobacteriaceae* (OTU1 and OTU5), unclassified *Prevotellaceae* (OTU4 and  
174 OTU30) and OTU24 *Cloacibacillus* were greater in MRO. The OTUs affiliated with  
175 *Prevotella* (OTU2, OTU6, OTU13,) in top 30 had higher abundance in MRC and  
176 MCA. The MRC were abundant with OTU10-*Roseburia* OTU20-*Olsenella* and  
177 OTU21-*Prevotella*. The bacteria belong to genera of *Prevotella* (OTU6 and OTU13)  
178 *Succinivibrio* (OTU9), unclassified *Prevotellaceae* (OTU15), *Succinoclasticum*  
179 (OTU22) had the highest relative abundance in MCA.

180

### 181 **The signature microbiota differentiating MRO, MRC and MCA supplementary** 182 **regimes**

183 To identify the rumen important microbiome that differentiate MRO, MRC and  
184 MCA, we performed an updated RandomForest classification model to differentiate  
185 these 3 supplementary regimes. The regimes-associated bacterial features were listed  
186 based on their MDA and the representatively selected microbiota were presented in  
187 Figure 4. All 3 groups were analyzed together, and optimal features with an AUC  
188 (area under the curve) of 1.00 (specificity 1.00, sensitivity 1.00) were selected from  
189 AUCRF model (Table S7; Figure S2). High AUC (0.931) was still observed at 50<sup>th</sup>  
190 feature suggesting those signatures being able to accurately predict whether goats was

191 fed concentrate plus alfalfa. Among top 50 features, only 3 core OTUs such as OTU5  
192 (unclassified *Sphingobacteriaceae*), OTU24 (*Cloacibacillus*) and OTU6 (*Prevotella*)  
193 were identified as regime-associated bacteria (Figure 4). Forty of top 50 bacteria were  
194 more abundant in MRO. OTU5 associated with MRO predominant genus had more  
195 relative abundance and prevalence (11.13%; 6/6) as compared with MRC (0.03%, 2/6)  
196 and MCA (0.04%, 2/6). OTU24 as qualitative signatures had more abundance 2.16%  
197 in MRO. Other species associated with *Prevotella* that was enriched genus in solid  
198 diet groups were also found more abundant in MRO, including OTU119, OTU42 and  
199 OTU60. For MCA microbiome, OTU6 and OTU104 affiliated with predominant  
200 *Prevotella* increased. We observed the relative abundances of OTU6 was 0.01% 1.35%  
201 and 5.89% in MRO, MRC and MCA (prevalence 2/6, 6/6 and 6/6). OTU87  
202 (*Butyrivibrio*) and OTU83 (unclassified *Bacteroidales*) were significantly enriched in  
203 MCA and extremely low abundance in MRO and/or MRC. Similar patterns could be  
204 found in other MCA predictors such as OTU93 and OTU74 (*Treponema*), OTU539  
205 (unclassified *Clostridiales*), OTU396 (unclassified *Proteobacteria*), OTU221  
206 (*Pseudobutyrvibrio*) and OTU110 (unclassified *Prevotellaceae*) (Figure S3-1 &  
207 S3-2).

208 Then, we performed pair wise AUCRF comparisons to validate these predictors.  
209 The results confirmed that most of the classified biomarkers could also be listed  
210 (Figure S4-S6). Moreover, MRC were enriched with OTU148 (unclassified  
211 *Lachnospiraceae*) and OTU114 (*Megasphaera*) compared with MRO, whereas it had  
212 more abundance of OTU643 (*Neisseria*), OTU177 (*Campylobacter*) and OTU314

213 (*Blautia*) as compared with MCA.

214

## 215 **Phenotypes and rumen microbiota**

216 To find the relationship between rumen microbiota with major nutrients of diet  
217 for better understanding how supplementary feeding regimes influenced microbial  
218 communities. Firstly, we performed RandomForest regression model by using CP,  
219 NFC and NDF intake as outcomes and all taxa as independent variables. Then, the  
220 Pearson correlations were calculated between selected top 50 bacterial abundances  
221 and dietary CP, NFC and NDF intake respectively (Figure 5). On other hand, the  
222 impacts of alteration of rumen microbiota on rumen VFA were also estimated using  
223 same approaches.

224 The rumen microbiota had high prediction accuracy (>73%) to explain nutrients  
225 intake (Table S8). Among CP, NFC and NDF, 31 shared bacteria were observed, and  
226 30 of 31 were the predictors identified by RandomForest classification model. In  
227 these shared bacteria, 27 as MRO-associated predictors had negative correlation with  
228 intake of CP, NFC and NDF, such as OTU5, OTU24. For other 3 shared features,  
229 OTU327 (*Clostridium XIVa*) negatively correlated with intake of CP, NFC and NDF,  
230 OTU148 (unclassified *Lachnospiraceae*) had no correlation ( $p>0.05$ ), and OTU6  
231 (*Prevotella*) was positively and moderately correlated with them ( $r=0.53, 0.48, 0.49$ ,  
232  $p=0.023, 0.043, 0.041$ ). Regarding to CP and NFC intake, OTU165 (unclassified  
233 *Prevotellaceae*) was the shared OTUs increasing abundances. The OTU396  
234 (unclassified *Proteobacteria*) and OTU27 (unclassified *Prevotellaceae*) were

235 specifically and positively correlated with CP intake ( $r=0.55$ ,  $0.63$ ,  $p=0.019$ ,  $0.005$ ).

236 When NDF intake was observed, the abundances of its associated microbiota went up.

237 For example, OTU464 (unclassified *Burkholderiales*) increased with more NDF

238 intake ( $r=0.65$ ,  $p=0.003$ ), while others identified as predictors for MCA (i.e., OTU87,

239 OTU83, OTU93, and OTU539) also linearly increased abundance with increase of

240 NDF intake ( $r=0.53$ ,  $0.52$ ,  $0.49$ ,  $0.50$  and  $0.48$ ). Interestingly, OTU74 (*Treponema*)

241 identified as MCA signature had no significant association with NDF intake ( $r=0.38$ ,

242  $p=0.124$ ). Moreover, the OTU396 and core significant *Succiniclasticum* (OTU22)

243 tended to moderately correlate with NDF intake ( $r=0.46$ ,  $p=0.051$ ;  $r=0.41$ ,  $p=0.09$ ).

244 Although the regression prediction of MCP and  $\text{NH}_3\text{-N}$  was not high (50.97% and

245 44.94%), OTU6 and OTU27 correlated with CP were associated with  $\text{NH}_3\text{-N}$ , and

246 other regime-associated signature (OTU148) significantly correlated with rumen

247 nitrogen indexes (File S1). Moreover, OTU152, OTU268 and OTU322 had

248 significant correlation with MCP. The rumen microbiota also had accurate prediction

249 for VFA concentration (Table S8). Shared OTUs were also found in the list of

250 between RandomForest classification and VFA regression (i.e., 39 acetate, 17

251 propionate, 24 butyrate, 25 valerate, 36 Total VFA). Those shared OTUs were most

252 of MRO-associated signatures and negatively correlated with VFA. For the bacteria

253 positively correlated with Total VFA, they were also observed within 1 or 2 of acetate,

254 propionate or butyrate regression models, for example, OTU6 within Total VFA and

255 butyrate; OTU396 within Total VFA and propionate and butyrate. Considered the

256 major VFA (acetate, propionate and butyrate), OTU83 was the only common

257 microbes were correlated positively with all of them ( $r=0.63, 0.54, 0.56$ ;  $p=0.005,$   
258  $0.020, 0.017$ ). When increasing acetate was observed, the abundances of OTU122  
259 (*Ruminobacter*), OTU143 (*Fibrobacter*) and OTU204 (unclassified *Bacteroidetes*)  
260 tends to increase. Regarding to propionate, positive correlation were found in the  
261 bacteria, such as OTU13 (*Prevotella*), OTU93 (*Treponema*), OTU165 (unclassified  
262 *Prevotellaceae*), OTU258 (*Olsenella*), OTU120 (*Megasphaera*), OTU532  
263 (unclassified *Bacteroidetes*), OTU322 (*Allisonella*), OTU604 (*Eubacterium*) and  
264 OTU530 (*Mitsuokella*). The butyrate-associated bacteria were OTU6, OTU13,  
265 OTU539, OTU15 (unclassified *Prevotellaceae*), OTU17 (unclassified  
266 *Lachnospiraceae*), OTU114 (*Megasphaera*) and OTU205 (unclassified *Firmicutes*).  
267 Notably, higher ensemble prediction score (70%) in valerate regression indicated that  
268 rumen microbiota explained it better as well. When valerate increased, unclassified  
269 *Lachnospiraceae* (OTU148 and OTU391), *Olsenella* (OTU20, OTU258),  
270 *Megasphaera* (OTU114, OTU120 and OTU173), unclassified *Clostridiales*  
271 (OTU311), *Mitsuokella* (OTU152), unclassified *Bacteria* (OTU52), *Prevotella*  
272 (OTU186) and unclassified *Porphyromonadaceae* (OTU47) linearly increased.

273

#### 274 **Rumen microbiota driving function shifts**

275 To predict how rumen microbiota associate with solid diet supplementary  
276 regimes, PICRUSt based on OTUs' level was used to predict the abundances of  
277 functional categories the KEGG. In the level 3, nutrient pathways were the most  
278 popular in this study (Figure S7). Many bacterial genes in all 3 groups could

279 potentially trigger pathway function of same nutrient metabolism, but different  
280 treatments participated different reaction modules. For example, carbohydrate  
281 metabolism found in all groups had the specific reaction of pyruvate metabolism and  
282 citrate cycle in MRO; Fructose, mannose Starch and sucrose metabolism in MRC; and  
283 glyoxylate and dicarboxylate metabolism in MCA. Moreover, some cellular process  
284 pathways were found in goat supplied with solid diet. MRC was enriched membrane  
285 transport (ABC transporters) and Insulin signaling pathway. The pathways of  
286 transcription factors and machinery were found in MRC and MCA.

287 The FishTaco was performed to identify the corresponding microbiota driving  
288 the functional shifts between supplementary regimes. There were no differences of  
289 normalized abundance of functions between MRC as control and MCA as case based  
290 on Wilcoxon rank-sum test. When MRO as control and case defined as MRC and  
291 MCA separately, 31 and 37 significant pathways were found (File S2-S3). Notably,  
292 21 shared functions were observed between 2 comparisons, including metabolism of  
293 nutrient (lipid, amino acid, carbohydrate, vitamin, peptidoglycan, terpenoids and  
294 polyketides), and the pathway of endocrine system and cellular processes. (Figure 6 &  
295 S8-S9). To better understand the driver OTUs function, we get all sequences identifier  
296 with the highest scores on NCBI BALSTN database (File S4). Across all significant  
297 functions enriched in MRC, a set of *Prevotella* bacteria including OTU3 (*Prevotella*  
298 *copri DSM*), OTU2 (*Prevotella brevis strain GA33*), OTU14 (*Prevotella histicola*)  
299 and OTU16 (*Prevotella ruminicola*) (occurrence 100%, 83.3%, 60% and 13.3%) were  
300 the main drivers (Figure S8-S9). While in MCA, the function shifts were driven by a

301 convoluted outcome of *Fibrobacter* and *Prevotella* including OTU11 (*Fibrobacter*  
302 *succinogenes*), OTU2, OTU3, OTU7 (*Prevotella ruminicola*) and OTU13 (*Prevotella*  
303 *brevis strain GA33*) (their occurrence 100%, 100%, 100%, 30.3% and 15.2%).  
304 Although selenocompound metabolism pathway was enriched in MRC and MCA  
305 compared with MRO, the set of OTUs drove this enrichment of 2 regimes and the  
306 level of contribution of each specie differed, with OTU2, OTU3 and OTU14 driving  
307 the shift in MRC and a set of OTU2, OTU3, OTU11, and OTU13 in MCA (Figure 6).  
308 These enrichments were attenuated by greatly different bacteria in MRC (OTU20,  
309 OTU16, OTU8, OTU10, OTU12 and OTU14) and MCA (OTU15, OTU6, OTU7,  
310 OTU17, OTU22 and OTU9). Other highlight pathways such as lipid and carbohydrate  
311 metabolism, Biosynthesis of unsaturated fatty acids and transporters had similar  
312 pattern. In addition, the MRO enriched microbiota including unclassified  
313 *Sphingobacteriaceae* (OTU1 and OTU5 *Olivibacter sitiensis*) and *Cloacibacillus*  
314 (OTU24 *Cloacibacillus porcorum*) were strongly depleted by solid diets.

315

### 316 **Network analysis of regime associated microbiota**

317 Network analysis revealed core sun-community structure within communities  
318 that consisted of a set of bacteria associated with the phenotypes and rumen functions  
319 in the supplementary regimes. We detected respectively 4, 7 and 8 main subnetworks  
320 in MRO, MRC and MCA (Figure 7). The species that were observed as  
321 regime-associated features and identified as functions drivers formed the main  
322 subnetwork. In MRO, the predictors, OTU60 (violet cluster), OTU42 and OTU111

323 (green cluster), OTU99, OTU79, OTU55 (yellow cluster) and OTU33, OTU94,  
324 OTU89 (pink cluster) formed the main subnetwork, showing significant correlations  
325 with a large number of other members of MRO community. For MRC rumen  
326 microbiota, OTU2, OTU6 OTU16 within palegreen cluster, OTU3 within pink cluster  
327 and OTU14 within yellow cluster, as dominate species associated with other members,  
328 consisted of the main subnetworks. Within MCA, OTU104, OTU11, OTU2, OTU6,  
329 OTU13, OTU87, OTU74, OTU83 and OTU3 recognized as main drivers or signatures  
330 were the main members of subnetworks. Their partners interacted with these  
331 microbiota may associate with fermentation, such as OTU7 and OTU27 in MCA.  
332 Moreover, OTU79 (*Snodgrassella alvi*) and OTU99 (*Elusimicrobium minutum*) as  
333 hub nodes in MRO connected yellow and blue cluster, whereas OTU87 (*Butyrivibrio*  
334 *hungatei*), OTU15 (*Metaprevotella massiliensis*) and OTU31 (*Fibrobacter*  
335 *succinogenes* subsp. *Elongates*) served as a bridge to link three clusters.

336

### 337 **Discussion**

338 Early supplementary feeding with solid diet has a positive impact on rumen  
339 development by influencing rumen microbial population and composition,  
340 environment alteration and functional achievement. However, lack of information of  
341 microbial predictors for supplementary regimes leads to unclear mechanism of  
342 manipulation of rumen microbiota and function shifts. This study confirmed that  
343 rumen VFA especially acetate, propionate and butyrate increased significantly with  
344 the supplementation of solid diet, and promoted rumen weight and functions. The



345 predominate genera changed from unclassified *Sphingobacteriaceae* to *Prevotella*  
346 when goat kids were supplied solid diet. The signature microbiota in corresponding  
347 feeding regimes significantly correlated with phenotypes such as major nutrients  
348 intake and VFA concentration. For example, the biomarkers for MCA (OTU6,  
349 OTU87, OTU83, OTU93 and OTU539) were positively correlated with NDF intake  
350 and VFA production. The improved rumen function in goats supplied solid diet were  
351 caused by the core bacteria, such as OTU3 (*Prevotella copri DSM*), OTU2 (*Prevotella*  
352 *brevis strain GA33*), OTU14 (*Prevotella histicola*) and OTU11 (*Fibrobacter*  
353 *succinogenes*). All these signatures and/or core microbiome formed main  
354 sub-communities to response solid diet feeding and drive function shifts.

355 The VFAs that are products of the fermentation of diets are essential to the  
356 rumen papillae development and nutrient source for host requirements (15). In  
357 ruminants, VFA produced in the rumen meets 70–80% of the energy requirement for  
358 the rumen epithelia, and 50–70% of the energy requirement for the body (16). In this  
359 study, rumen microbial proteins and VFA concentration increased in supplementation  
360 of solid diet. Other studies also revealed that early starter and alfalfa consumption  
361 facilitated rumen development and changed the pattern of ruminal fermentation (9, 11,  
362 17). Moreover, we found the rumen microbial proteins and VFAs were positively  
363 correlated with intake of CP, NDF and NFC. Previous study reported that ruminal  
364 NH<sub>3</sub>-N increased linearly in response to increasing dietary CP (18). This study  
365 confirmed that microbiota in goats fed solid diet had more strong ability for  
366 biosynthesis of microbial proteins and VFA. Moreover, except the physical

367 stimulation from solid diet, the chemical effects of nutrient intake may be another  
368 reason leading to increase of VFA. Therefore, early supplementation of solid diet  
369 leading to high nutrient intake increases rumen VFA production and nitrogen  
370 utilization efficiency, which reflects that microbiome experienced solid diets had a  
371 strong ability to utilize nutrient.

372 In pace with the change of rumen environment, this study also observed that the  
373 membership and structure of microbiota also altered by supplied with concentrate or  
374 forage compared with only fluid diet groups. Significant lower alpha diversity in  
375 starter feed-lambs and distinct beta diversity between starter feed- and breast milk-fed  
376 lambs were also reported (11). High bacterial richness in fluid diet groups might be  
377 temporary phenomenon at d60. Others confirmed that rumen microbiota at d70 had a  
378 lower richness compared with it at d42 (8). As we know, rumen is in rumination  
379 phase after 8 weeks and in transition phase in 3-8 weeks. In this study, compared with  
380 MRO, rumen microbiota in goats supplied with solid diet at d60 may have a more  
381 mature rumen function and stable microbiome structure at the same age. Another  
382 reason for reduction of richness in solid feeding regimes might be due to high  
383 concentration of VFA and low pH (19). In addition, the rumen microbiota in solid  
384 supplementary regimes had similar alpha and beta diversity. The similar pattern also  
385 could be observed in rumen fermentation parameters. This might be due to less feed  
386 intake of alfalfa and similar concentrate intake. In animal trial, the MCA goats had *ad*  
387 *libitum* access to concentrate and alfalfa pellets in separately troughs. Based on feed  
388 intake results, the goats preferred concentrate. Thus, future studies have to increase

389 roughage intake for its effects on rumen microbiota or detect the microbiome after  
390 weaned milk replacer.

391 RandomForest is a powerful tool capable of delivering performance that is  
392 among the most accurate methods (20). It has been widely used in human microbiome  
393 studies to find the signatures for disease or healthy (21, 22). This study identified  
394 important signatures from 838 OTUs using RandomForest, which could provide more  
395 effective and accuracy information how diet supplementary regimes affected  
396 microbial composition. A higher AUC value (AUC=1.00) indicates the features are  
397 more efficiently classified. RandomForest not only gave an important score to the  
398 significant species but also find the accurate bacteria for experimental factors. For  
399 example, the low abundances of OTU87, OTU83, OTU93 and OTU539 were  
400 identified as the important predictor for regimes, which indicated that low abundance  
401 bacteria may also paly critical roles in function drifts. Therefore, previous literature (3,  
402 10) only focused on the genera with significantly different abundances may not  
403 provide the best conclusion. RandomForest regression is useful and robust method for  
404 correlation applications because of its ability of automatically producing accuracy  
405 estimation and measuring the variable importance. Using it to select microbiota with  
406 high important scores would be a better and corrected method for finding precise  
407 signatures. The percent explained variance is a measure of how well out-of-bag  
408 predictions explain the target variance of the training set. High % explained variance  
409 (over 70%) in this study were found in CP, NFC and NDF model, which indicated  
410 that those top microbiota were more important to the responders. It helps to figure out

411 the relationship between specific nutrient and microbiota. In addition, using FishTaco  
412 to link the microbiota abundances and rumen function shift caused by supplement of  
413 solid diet is a creative attempt (13). We used it to integrate comprehensively the  
414 significant species and function shifts. Compared with the original PICRUSst result,  
415 there was an improved result of significant pathways. Its process rely on a  
416 permutation-based approach, carefully designed normalization and scaling schemes to  
417 preserve overall community taxonomic characteristics and to account not only for  
418 variation induced by each bacteria but also for the way this variation correlated with  
419 community-wide context. Our results identified that a set of core bacteria were the  
420 main taxon drivers since low taxonomic abundance profiles were filtered and  
421 normalized. Finally, we observed subnetworks formed by these signature microbiota  
422 and their partners. In a word, more algorithms gave insights how microbiota had  
423 impacts on function shifts.

424 Rumen microbiota degrade fibers polysaccharides and proteins in diet, and yield  
425 VFAs and microbial proteins, which offer nutrients to meet the host's requirement for  
426 maintenance and growth (23, 24). Based on these machine leaning algorithms, we  
427 analyzed microbiome to link supplementary regime to alteration of rumen  
428 environment and function. Supplementary solid diet altered the core microbiota from  
429 unclassified *Sphingobacteriaceae* to *Prevotella*. The representative OTU5 associated  
430 with unclassified *Sphingobacteriaceae* as MRO predictors were negatively with  
431 macronutrients intake and VFA production. OTU5 classified as *Olivibacter sitiensis*  
432 function is not clear, but it decreased with pH reduction when intake high concentrate

433 diet (25). The species affiliated with *Prevotella* (OTU2, OTU3, OTU6 and OTU13) in  
434 top 30 increased in solid supplementary regimes. Other studies also reported that the  
435 abundances of the genus *Prevotella* that was predominant in starter-fed lambs  
436 positively correlated with acetate, propionate and urea nitrogen concentration (3, 8,  
437 11). This genus is good at utilization of proteins and carbohydrates (either fiber- or  
438 non-fiber-carbohydrate) (26). Importantly, OTU6 (*Prevotella oralis*) was identified as  
439 signature species for solid diets, correlated with macronutrient intake and butyrate  
440 concentration. Another microbiota, OTU13 (*Prevotella brevis strain GA33*), was not  
441 classified as predictors for MCA, but we observed it had high abundance in MCA,  
442 positive association with propionate and butyrate, driving function shifts and  
443 interaction with other core microbiome. Therefore, increased abundance of these 2  
444 species represented as *Prevotella* in rumen accessed solid diets promoted the  
445 improvement of rumen digestibility and function by yielding more VFA products.  
446 OTU2 (*Prevotella brevis*) and OTU3 (*Prevotella copri*) were the main drivers for  
447 functions shifts by solid diet. De Filippis et al. detected distinct strains of *Prevotella*  
448 *copri* by metagenome studies and showed that fiber-rich diets were linked to these  
449 strains with improved potential for carbohydrate catabolism (27). Broadly,  
450 introduction of solid fiber-rich diet to goat before weaning, *Prevotella* proliferated,  
451 which was also observed in other large domestic animals (28). They could be used as  
452 potential microbiota to utilize solid diet, maintain rumen community balance and  
453 prevent metabolic disease caused by dysbiosis. Another core genus increased in both  
454 solid diet regimes was unclassified *Lachnospiraceae*. The family *Lachnospiraceae*

455 contains many known plant degrading species and most of the butyrate-producers (29).  
456 In our results, OTU148-*Lachnospiraceae* (*Kineothrix alysoides*) enriched in MRC  
457 was significant associated with NH<sub>3</sub>-N and valerate, although it was identified by  
458 regression model for nutrients intake and fermentation parameters. Regarding to  
459 others dominant bacteria, whereas *Roseburia* and *Selenomonas* specifically increased  
460 in concentrate diet regime. The abundances of *Fibrobacter*, *Treponema* and  
461 *Succinivibrio* arose became greater in extra supplementation of alfalfa. *Succinivibrio*,  
462 a saccharolytic bacteria, can yield acetate and lactate (30). The OTUs associated with  
463 these genera were not observed well in our study. For example, OTU10-*Roseburia*  
464 and OTU9-*Succinivibrio* formed main structure with other members; OTU74  
465 affiliated with *Treponema* predicted MCA well but no relation with phenotypes; and  
466 OTU11-*Fibrobacter* drove the enriched functions of MCA while  
467 OTU143-*Fibrobacter* increased with acetate. These microbes either at genus or OTUs  
468 level had significant abundances in different regimes, however, they were not  
469 correlated with phenotypes very well. The reasons might be they were symbiotic with  
470 other microbiota. For example, *Treponema* does not utilize fiber, but it helps other  
471 bacteria to digest cellulosic materials (31).

472 The MCA-associated features, OTU87 (*Butyrivibrio hungatei*), OTU83  
473 (*Prevotellamassilia timonensis*), OTU539 (*Abyssivirga alkaniphila*), and OTU93  
474 (*Treponema pectinovorum*), correlated positively with NDF intake. Nevertheless,  
475 OTU539 associated with butyrate production and OTU93 related with propionate  
476 while OTU83 correlated with all 3 major VFA. The *Butyrivibrio hungatei* is the

477 primary butyrate producers in the rumen and degraded effectively hemicellulose (32).  
478 *Prevotellamassilia timonensis* is a hemicellulose-degrading bacteria (33). *Abyssivirga*  
479 *alkaniphila* ferments saccharides, peptides and amino acids (34). *Fibrobacter* and  
480 *Treponema* synergetically break down the fiber components (35, 36). The function of  
481 OTU396 (*Pelobacter propionicus*) and OTU165 (*Marseilla massiliensis*) may be  
482 similar with OTU6. We observed their association with macronutrient and major VFA.  
483 Those MCA signatures cooperatively digest carbohydrate or protein and produce VFA.  
484 Increase of butyrate that is as an important regulator and stimulator of rumen  
485 development. Gorka et al. (37) revealed that the supplementation of alfalfa (NDF)  
486 could improve rumen development by increasing abundance of these synergistic  
487 bacteria. In addition, the OTU27 (*Prevotella falsenii*) might be nitrogen-specific  
488 bacteria since it correlated with CP intake and NH<sub>3</sub>-N very well though it was not  
489 classified as MCA signatures. A review reported some strains in *Prevotella* can  
490 degrade dietary proteins (31). Therefore, those signatures for regimes supplied with  
491 alfalfa contribute to both protein and carbohydrate utilization, and yield more nitrogen  
492 materials and VFA for host development. By contrast, the MRO signature microbiota  
493 cannot promote rumen functions at ruminant phase, however, they still may provide  
494 some baseline information of rumen in non-ruminant stage. Except  
495 *Sphingobacteriaceae*, OTU24 (*Cloacibacillus*) was another important specie for goats  
496 used only milk replacer as nutrient source. *Cloacibacillus* is a novel bacterium that  
497 degrades amino acids and produced VFAs (38). These MRO-associated signatures  
498 could be considered as passengers that contributed rumen development at specific

499 time. Although little was known about their contribution of these bacteria, they were  
500 important for digestion of milk replacer and could be the primary strains impacted on  
501 late bacterial colonization.

502 The first limitation of this study is small sample size (6 per groups). However, it  
503 still showed good results between fluid diet and supplement of solid diet, providing  
504 some insights for future large scale studies. Second, the alfalfa in MCA groups were  
505 provide *ad libitum* resulting in less intake and less significant effects of adding alfalfa,  
506 but we did observed many bacteria related with fiber digestion due to significant fiber  
507 effects. Despite limitations, we confirm that signature microbiota for supplementary  
508 solid diet plays important roles in the promotion of rumen functions. Moreover, most  
509 of the MRO signatures function were not well described and are required for the  
510 identification of their functions by longitudinal measurements in further studies.

511

## 512 **Conclusions**

513 Rumen fermentation and microbial composition were altered by supplementation  
514 of concentrate or concentrate+alfalfa, particularly the latte, in early life. The  
515 concentration of rumen VFA especially acetate, propionate and butyrate increased  
516 significantly when goats intake more nutrients from solid diet, and positively  
517 correlated with intake of crude protein, non-fiber carbohydrate and neutral detergent  
518 fiber. The membership and structure of rumen microbiota were altered. This study  
519 identified a set of signatures for supplementary solid diet regimes and validated their  
520 association with macronutrient intake and rumen fermentation. Also, it was the first



521 time to use FishTaco for determination of link between those signatures' abundances  
522 and rumen function shifts. Then, we performed network analysis to detect the  
523 interaction of signatures. By comprehensive integration, many members of bacteria  
524 having symbiotic relationship with signatures were classified. Therefore, for goat kids,  
525 extra nutrient from concentrate and/or forage manipulated core community structures  
526 by specific signature microbiota and their symbiotic partners, and then more volatile  
527 fatty acids were produced, and eventually rumen development and functions were  
528 promoted.

529 Our study answers several key questions in rumen microbiome affected by  
530 supplementary solid diet, and offers a foundation for studies aimed at improving  
531 ruminant health and production.

## 532 **Materials and Methods**

### 533 ***Goat kids, treatments and management***

534 The experimental procedure was approved by the Chinese Academy of  
535 Agricultural Sciences Animal Ethics Committee, and humane animal care and  
536 handling procedures were followed throughout the experiment. This animal trial was  
537 conducted using Haimen goat kids at a commercial farm in the Jiangsu province,  
538 China.

539 A total of 72 Haimen goat kids (20 days old and average body weight  $4.54 \pm$   
540  $0.51$ kg) were separated from their dams, and randomly allotted to three groups based  
541 on their following diets: milk replacer only (**MRO**), milk replacer + concentrate  
542 (**MRC**), milk replacer + concentrate + alfalfa pellets (**MCA**). Each group had six

543 replicates and four kids per pen were as a replicate.

544 Goat kids remained with their mother and received breast milk from 0 to 20 days.

545 During 20 to 60 days of age, they were separated with their dams and the above 3

546 kinds of diets were provided to corresponding groups. Other feeding management

547 including vaccination, cleaning and disinfection of pens followed farm normal policy.

548 All animals were fed with milk replacer from 20 to 60 days. Feeding amount of milk

549 replacer were 2% body weight. Goat kids were fed 4 times a day (0600, 1200, 1800

550 and 2200) at 20-30 days, and thrice daily at 30-60 days (0600, 1200 and 1800). The

551 milk replacer was dissolved with hot water cooled to 65-70 °C after boiling, and

552 offered to goat kids when it was cooled to  $40 \pm 1$  °C. The ratio of milk replacer to

553 water was 1:6 (weight (g)/ volume (ml)). The milk replacer (China patent products

554 ZL02128844.5) used in the experiment was provided by Beijing Precision Animal

555 Nutrition Research Center. The concentrate with ingredients of corn, soybean etc. was

556 purchased from Cargill Feed company, Nanjing. The alfalfa pellets purchased from

557 Baofa Agriculture and Animal Husbandry Co. Ltd, Gansu, China had same diameter

558 (4 mm) with concentrate diet. During the animal trial, all the goat kids had *ad libitum*

559 access to water, the MRC and MCA kids were freely to access concentrate, and the

560 MCA goats had extra free choice of alfalfa pellets. The nutritional levels of milk

561 replacer, concentrate and alfalfa pellets are shown in Table S1.

#### 562 ***Sample collection and Chemical analysis***

563 Daily feed intakes were recorded in animal trial. Feed samples were collected,

564 dried in a forced-air oven at 65°C for 48 h and analyzed for crude protein (CP),

565 non-fiber carbohydrate (NFC), and neutral detergent fiber (NDF) according to the  
566 Association of Official Analytical Chemists (39). Then, average daily intake of CP,  
567 NFC and NDF were calculated. Only data of table S1 (dietary composition) and table  
568 S2 (growth performance) were published in a Chinese journal paper (40), and other  
569 data, such as rumen fermentation parameters and microbiome analysis, were not  
570 published and used for the current draft.

571 Six goat kids (healthy and BW close to the average BW of the corresponding  
572 groups) from each group were selected and slaughtered for rumen samples collection.  
573 At 60 days of age, the goat kids were taken to an on-farm slaughterhouse,  
574 anesthetized using sodium pentobarbitone, and slaughtered by exsanguination from  
575 the jugular vein. Then, the rumen organs were taken out, and the ruminal content pH  
576 was measured immediately using pH electrode (PB-10; Sartorius, Goettingen,  
577 Germany). Around 10 ml rumen content were sampled from the whole mixed rumen  
578 digesta and stored at -80°C for sequencing. The rumen fluid around 10 ml filtered  
579 through four layers of gauze was placed in a 15 ml centrifuge tube immediately frozen  
580 at -20°C for measurement of rumen fermentation. Determination of rumen fluid  
581 NH<sub>3</sub>-N concentration by phenol-sodium hypochlorite colorimetric method after the  
582 liquid was thawed at 4°C. The microbial proteins were analyzed according to the  
583 method described by (41). The volatile fatty acids (VFA) in rumen fluid were  
584 quantified by gas chromatography (42) using methyl valerate as internal standard in  
585 an Agilent 6890 series GC equipped with a capillary column (HP-FFAP19095F-123,  
586 30 m, 0.53 mm diameter and 1 mm thickness).

## 587 *DNA extraction and 16S rRNA gene sequencing*

588 Rumen fluid samples were thawed on ice and microbial DNA was extracted  
589 using a commercial DNA Kit (Omega Bio-tek, Norcross, GA, U.S.) according to  
590 manufacturer's instructions. Total DNA quality analysis using a Thermo NanoDrop  
591 2000 UV spectrophotometer and 1% agarose gel electrophoresis. The V3-V4 region  
592 of the bacteria 16S ribosomal RNA genes were amplified by PCR (95 °C for 3 min,  
593 followed by 30 cycles at 98°C for 20 s, 58 °C for 15s, and 72 °C for 20 s and a final  
594 extension at 72 °C for 5 min) using indexes and adaptors-linked universal primers  
595 (431 F:ACTCCTACGGGRSGCAGCAG; 806R: GGACTACVVGGGTATCTAATC).  
596 PCR reactions were performed in 30 µL mixture containing 15 µL of 2 × KAPA  
597 Library Amplification Ready Mix, 1 µL of each primer (10 µM), 50ng of template  
598 DNA and ddH<sub>2</sub>O. All PCR products were normalized and quantified by a Qubit 2.0  
599 Fluorometer (Thermo Fisher Scientific, Waltham, US). Amplicon libraries were  
600 mixed using all qualified products and sequenced with Illumina HiSeq PE250  
601 platform at Realbio Technology Genomics Institute (Shanghai, China).

## 602 *Sequencing Data Processing*

603 Raw sequences were filtered through a quality control pipeline using the  
604 Quantitative Insight into Microbial Ecology (QIIME) tool kit (43). The chimeras and  
605 singletons were detected and removed by Usearch software, and the high quality  
606 sequences were clustered into operational taxonomic units (OTUs) at the 97%  
607 similarity level. Samples were normalized to 24136 sequencing reads. The  
608 representative sequence was classified based on the Ribosomal Database Project

609 (RDP) database (44) at the default confidence threshold of 0.8, trained on the SILVA  
610 reference database (release 111) (45). The alpha diversities (Shannon Index and  
611 Observed species), and beta diversity (Unweighted and Weighted Unifrac distance)  
612 were calculated. The ANalysis Of SIMilarity (ANOSIM) test was used to examine the  
613 statistical significance of differences in beta diversity. The datasets in the current  
614 study are available in the NCBI BioProject database with the BioProject ID  
615 PRJNA544381 (<https://www.ncbi.nlm.nih.gov/sra/PRJNA544381>).

616

### 617 *Data Analysis*

618 Rumen fermentation parameters were shown using bar charts made in R (v3.6.0)  
619 by ‘ggplot2’ package. The Anova test was used for significance calculation after  
620 detection of homogeneity of variance. After the global test was significant, a post-hoc  
621 analysis (Tukey's HSD test) was performed to determine which group of the  
622 independent variable differ from each other group.

623 Alpha diversity of the rumen microbial data among three treatments was tested  
624 using Kruskal–Wallis test and a post-hoc Dunn Kruskal-Wallis multiple comparison  
625 with Bonferroni adjustment to evaluate differences between two groups, and boxplots  
626 were made in R (‘ggpubr’ packages). Beta diversity was visualized with PCoA plot  
627 through R.

628 RandomForest classification model was performed to identify the top  
629 microbiome signatures to differentiate 3 supplementary feeding regimes. R package  
630 ‘AUCRF’ (v.1.1) was used to process RandomForest model and select optimal

631 variables based on the area-under-the receiver operator characteristic curve (AUC) of  
632 the RandomForest method (AUCRF) (46). The relative abundances of all the  
633 microbiota were included for predictors selection. The ‘ntree’ parameters was set at  
634 10,000 in the model. For calculation the probability of each selected variable, a  
635 10-fold cross validation analysis and 20 times repetitions of cross validation were  
636 performed. The model accuracy, including AUC, sensitivity and specificity of  
637 variables, was calculated using the ‘pROC’ package (v.1.13). Thus, variables  
638 importance plot was generated based on the importance scores (Mean Decrease in  
639 Accuracy, MDA) of optimal features and their boxplots of selected features were  
640 drawn in R.

641 RandomForest regression model was used to select the rumen microbiota that  
642 were important for average daily intake of major nutrients (i.e., CP, NDF and NFC)  
643 and rumen fermentation parameters. The model was run in R software using  
644 ‘RandomForest’ package (v 4.6-14). The percent variance explained was reported for  
645 the estimation of accuracy of regression model. The top 50 selected features were then  
646 analyzed Pearson correlation with those macro indicators respectively.

647 Predictive function analysis was performed using the PICRUSt algorithm based  
648 on the Kyoto Encyclopedia of Genes and Genomes (KEGG) classification using the  
649 closed-reference OTUs (47). The Functional Shifts’ Taxonomic Contributors  
650 (FishTaco) software was used to find the rumen bacteria driving the functional shifts  
651 between supplementary regimes in this study. A taxonomic abundance at OTUs’ level  
652 and functional abundance profile at levels 3 from the PICRUSt analysis were used. In

653 pairwise comparisons, we labeled MRO groups as control and MRC or MCA as case,  
654 and tested MRC as control vs MCA as case. Each functional shift was grouped into  
655 case-associated with driving case-enrichment or attenuating case-enrichment, and  
656 control-associated driving case-enrichment or attenuating case-enrichment. The  
657 output results visualization was performed in FishTacoPlot package in R (Version  
658 3.6.0).

659 Network analysis was performed by calculating all possible Pearson rank  
660 correlation coefficients ( $\rho$ ) between microbial pairs. To minimize the occurrence of  
661 spurious associations, we considered a valid co-occurrence between two different taxa  
662 if a correlation co-efficiency over 0.6 or less than 0.6 and statistically significant. The  
663 network was demonstrated by using the ‘igraph’ package in R with edges connecting  
664 nodes (bacterial taxa). The subnetworks in regimes were produced based on the  
665 betweenness cluster calculated by the Girvan-Newman algorithm (48).

666

667

## 668 **Acknowledgements**

669 This study was funded by grants from National Key R&D Program  
670 Projects(2018YFD0501902), National Natural Science Foundation of China  
671 (31872385) and National Technical System Construction of Mutton Sheep  
672 Industry(CARS-39).

## 673 **Competing interests**

674 The authors declare that they have no competing interests.

675 **Supplemental material**

676 Supplementary information is available at the ISME journal's website.

677 **References:**

- 678 1. Voreades N, Kozil A, Weir TL. 2014. Diet and the development of the human intestinal  
679 microbiome. *Frontiers in Microbiology* 5.
- 680 2. Glendinning L, Collie D, Wright S, Rutherford KMD, McLachlan G. 2017. Comparing  
681 microbiotas in the upper aerodigestive and lower respiratory tracts of lambs.  
682 *Microbiome* 5:145.
- 683 3. Lin L, Xie F, Sun D, Liu J, Zhu W, Mao S. 2019. Ruminant microbiome-host crosstalk  
684 stimulates the development of the ruminal epithelium in a lamb model. *Microbiome*  
685 7:83.
- 686 4. Heinrichs AJ. 2005. Rumen development in the dairy calf. *Calf and heifer*  
687 *rearing*:53-65.
- 688 5. Sun DM, Mao SY, Zhu WY, Liu JH. 2018. Effect of starter diet supplementation on  
689 rumen epithelial morphology and expression of genes involved in cell proliferation and  
690 metabolism in pre-weaned lambs. *Animal* 12:2274-2283.
- 691 6. Vi RLB, McLeod KR, Klotz JL, Heitmann RN. 2004. Rumen development, intestinal  
692 growth and hepatic metabolism in the pre-and postweaning ruminant. *Journal of dairy*  
693 *science* 87:E55-E65.
- 694 7. Suarez BJ, Van Reenen CG, Beldman G, van Delen J, Dijkstra J, Gerrits WJ. 2006.  
695 Effects of supplementing concentrates differing in carbohydrate composition in veal  
696 calf diets: I. Animal performance and rumen fermentation characteristics. *J Dairy Sci*



- 697 89:4365-75.
- 698 8. Jiao JZ, Huang JY, Zhou CS, Tan ZL. 2015. Taxonomic Identification of Ruminant  
699 Epithelial Bacterial Diversity during Rumen Development in Goats. *Applied and  
700 Environmental Microbiology* 81:3502-3509.
- 701 9. Yang B, He B, Wang SS, Liu JX, Wang JK. 2015. Early supplementation of starter  
702 pellets with alfalfa improves the performance of pre- and postweaning Hu lambs.  
703 *Journal of Animal Science* 93:4984-4994.
- 704 10. Yang B, Le J, Wu P, Liu J, Guan LL, Wang J. 2018. Alfalfa Intervention Alters Rumen  
705 Microbial Community Development in Hu Lambs During Early Life. *Front Microbiol*  
706 9:574.
- 707 11. Wang WM, Li C, Li F, Wang XJ, Zhang XX, Liu T, Nian F, Yue XP, Li F, Pan XY, La YF,  
708 Mo FT, Wang FB, Li BS. 2016. Effects of early feeding on the host rumen  
709 transcriptome and bacterial diversity in lambs. *Scientific Reports* 6.
- 710 12. Liaw A, Wiener M. 2002. Classification and regression by randomForest. *R news*  
711 2:18-22.
- 712 13. Manor O, Borenstein E. 2017. Systematic Characterization and Analysis of the  
713 Taxonomic Drivers of Functional Shifts in the Human Microbiome. *Cell Host Microbe*  
714 21:254-267.
- 715 14. Einarsson GG, Zhao J, LiPuma JJ, Downey DG, Tunney MM, Elborn JS. 2019.  
716 Community analysis and co-occurrence patterns in airway microbial communities  
717 during health and disease. *ERJ Open Res* 5.
- 718 15. Suarez-Mena FX, Heinrichs AJ, Jones CM, Hill TM, Quigley JD. 2016. Straw particle

- 719 size in calf starters: Effects on digestive system development and rumen fermentation.  
720 Journal of Dairy Science 99:341-353.
- 721 16. Shen H, Lu ZY, Xu ZH, Chen Z, Shen ZM. 2017. Associations among dietary non-fiber  
722 carbohydrate, ruminal microbiota and epithelium G-protein-coupled receptor, and  
723 histone deacetylase regulations in goats. Microbiome 5.
- 724 17. Govil K, Yadav D, Patil A, Nayak S, Baghel R, Yadav P, Malpure CD, Thakur D. 2017.  
725 Feeding management for early rumen development in calves. J Entomol Zool Stud  
726 5:1132-1139.
- 727 18. Zhao F, Wang FJ, King MW, Wang L. 2019. Effect of dynamic and static loading  
728 during in vitro degradation of a braided composite bioresorbable cardiovascular stent.  
729 Materials Letters 250:12-15.
- 730 19. Kim YH, Nagata R, Ohkubo A, Ohtani N, Kushibiki S, Ichijo T, Sato S. 2018. Changes  
731 in ruminal and reticular pH and bacterial communities in Holstein cattle fed a  
732 high-grain diet. BMC Vet Res 14:310.
- 733 20. Svetnik V, Liaw A, Tong C, Culberson JC, Sheridan RP, Feuston BP. 2003. Random  
734 forest: A classification and regression tool for compound classification and QSAR  
735 modeling. Journal of Chemical Information and Computer Sciences 43:1947-1958.
- 736 21. Quinn RA, Adem S, Mills RH, Comstock W, DeRight Goldasich L, Humphrey G,  
737 Aksenov AA, Melnik AV, da Silva R, Ackermann G, Bandeira N, Gonzalez DJ, Conrad  
738 D, O'Donoghue AJ, Knight R, Dorrestein PC. 2019. Neutrophilic proteolysis in the  
739 cystic fibrosis lung correlates with a pathogenic microbiome. Microbiome 7:23.
- 740 22. Smillie CS, Sauk J, Gevers D, Friedman J, Sung J, Youngster I, Hohmann EL, Staley

- 741 C, Khoruts A, Sadowsky MJ, Allegretti JR, Smith MB, Xavier RJ, Alm EJ. 2018. Strain  
742 Tracking Reveals the Determinants of Bacterial Engraftment in the Human Gut  
743 Following Fecal Microbiota Transplantation. *Cell Host Microbe* 23:229-240 e5.
- 744 23. Hyder I, Reddy PRK, Raju J, Manjari P, Prasad CS, Kumar KA, Sejian V. 2017.  
745 Alteration in rumen functions and diet digestibility during heat stress in sheep, p  
746 235-265, *Sheep Production Adapting to Climate Change*. Springer.
- 747 24. Li F, Li C, Chen Y, Liu J, Zhang C, Irving B, Fitzsimmons C, Plastow G, Guan LL. 2019.  
748 Host genetics influence the rumen microbiota and heritable rumen microbial features  
749 associate with feed efficiency in cattle. *Microbiome* 7:92.
- 750 25. Wetzels SU, Mann E, Pourazad P, Kumar M, Pinior B, Metzler-Zebeli BU, Wagner M,  
751 Schmitz-Esser S, Zebeli Q. 2017. Epimural bacterial community structure in the rumen  
752 of Holstein cows with different responses to a long-term subacute ruminal acidosis diet  
753 challenge. *J Dairy Sci* 100:1829-1844.
- 754 26. Kim JN, Mendez-Garcia C, Geier RR, Iakiviak M, Chang J, Cann I, Mackie RI. 2017.  
755 Metabolic networks for nitrogen utilization in *Prevotella ruminicola* 23. *Scientific*  
756 *Reports* 7.
- 757 27. De Filippis F, Pasolli E, Tett A, Tarallo S, Naccarati A, De Angelis M, Neviani E,  
758 Cocolin L, Gobbetti M, Segata N, Ercolini D. 2019. Distinct Genetic and Functional  
759 Traits of Human Intestinal *Prevotella copri* Strains Are Associated with Different  
760 Habitual Diets. *Cell Host Microbe* 25:444-453 e3.
- 761 28. Wang X, Tsai T, Deng F, Wei X, Chai J, Knapp J, Apple J, Maxwell CV, Lee JA, Li Y,  
762 Zhao J. 2019. Longitudinal investigation of the swine gut microbiome from birth to

- 763 market reveals stage and growth performance associated bacteria. *Microbiome* 7:109.
- 764 29. Haas KN, Blanchard JL. 2017. *Kineothrix alysoides*, gen. nov., sp. nov., a  
765 saccharolytic butyrate-producer within the family Lachnospiraceae. *Int J Syst Evol*  
766 *Microbiol* 67:402-410.
- 767 30. Bryant MP. 2015. *Succinivibrio*. *Bergey's Manual of Systematics of Archaea and*  
768 *Bacteria*:1-3.
- 769 31. Zhang L, Chung JS, Jiang QQ, Sun R, Zhang J, Zhong YJ, Ren NQ. 2017.  
770 Characteristics of rumen microorganisms involved in anaerobic degradation of  
771 cellulose at various pH values. *Rsc Advances* 7:40303-40310.
- 772 32. Paillard D, McKain N, Chaudhary LC, Walker ND, Pizette F, Koppova I, McEwan NR,  
773 Kopecny J, Vercoe PE, Louis P, Wallace RJ. 2007. Relation between phylogenetic  
774 position, lipid metabolism and butyrate production by different *Butyrivibrio*-like bacteria  
775 from the rumen. *Antonie Van Leeuwenhoek International Journal of General and*  
776 *Molecular Microbiology* 91:417-422.
- 777 33. Iglesias-Iglesias R, Campanaro S, Treu L, Kennes C, del Carmen Veiga M. 2019.  
778 Valorization of sewage sludge for volatile fatty acids production and role of  
779 microbiome on acidogenic fermentation. *Bioresource Technology*:121817 %@  
780 0960-8524.
- 781 34. Schouw A, Vulcano F, Roalkvam I, Hocking WP, Reeves E, Stokke R, Bodtker G,  
782 Steen IH. 2018. Genome Analysis of *Vallitalea guaymasensis* Strain L81 Isolated from  
783 a Deep-Sea Hydrothermal Vent System. *Microorganisms* 6.
- 784 35. Shinkai T, Ueki T, Kobayashi Y. 2010. Detection and identification of rumen bacteria

- 785 constituting a fibrolytic consortium dominated by *Fibrobacter succinogenes*. *Animal*  
786 *Science Journal* 81:72-79.
- 787 36. Xie X, Yang CL, Guan LL, Wang JK, Xue MY, Liu JX. 2018. Persistence of Cellulolytic  
788 Bacteria *Fibrobacter* and *Treponema* After Short-Term Corn Stover-Based Dietary  
789 Intervention Reveals the Potential to Improve Rumen Fibrolytic Function. *Frontiers in*  
790 *Microbiology* 9.
- 791 37. Gorka P, Kowalski ZM, Pietrzak P, Kotunia A, Jagusiak W, Holst JJ, Guilloteau R,  
792 Zabielski R. 2011. Effect of method of delivery of sodium butyrate on rumen  
793 development in newborn calves. *Journal of Dairy Science* 94:5578-5588.
- 794 38. Ganesan A, Chaussonnerie S, Tarrade A, Dauga C, Bouchez T, Pelletier E, Le Paslier  
795 D, Sghir A. 2008. *Cloacibacillus evryensis* gen. nov., sp nov., a novel asaccharolytic,  
796 mesophilic, amino-acid-degrading bacterium within the phylum 'Synergistetes',  
797 isolated from an anaerobic sludge digester. *International Journal of Systematic and*  
798 *Evolutionary Microbiology* 58:2003-2012.
- 799 39. Aoa C. 2000. Association of official analytical chemists. Official methods of analysis  
800 12.
- 801 40. Xiaokang XIEBHWWWSBIYTAOHCUIKDQZN. 2019. Effects of Early Feeding on  
802 Rumen and Small Intestine Morphology of Goat Kids. *ACTA VETERINARIA ET*  
803 *ZOOTECNICA SINICA* 50:1006-1015.
- 804 41. Makkar HPS, Sharma OP, Dawra RK, Negi SS. 1982. Simple Determination of  
805 Microbial Protein in Rumen Liquor. *Journal of Dairy Science* 65:2170-2173.
- 806 42. Jiao JZ, Wang PP, He ZX, Tang SX, Zhou CS, Han XF, Wang M, Wu DQ, Kang JH,

- 807 Tan ZL. 2014. In vitro evaluation on neutral detergent fiber and cellulose digestion by  
808 post-ruminal microorganisms in goats. *Journal of the Science of Food and Agriculture*  
809 94:1745-1752.
- 810 43. Caporaso JG, Kuczynski J, Stombaugh J, Bittinger K, Bushman FD, Costello EK,  
811 Fierer N, Pena AG, Goodrich JK, Gordon JI, Huttley GA, Kelley ST, Knights D, Koenig  
812 JE, Ley RE, Lozupone CA, McDonald D, Muegge BD, Pirrung M, Reeder J, Sevinsky  
813 JR, Turnbaugh PJ, Walters WA, Widmann J, Yatsunenko T, Zaneveld J, Knight R.  
814 2010. QIIME allows analysis of high-throughput community sequencing data. *Nat*  
815 *Methods* 7:335-6.
- 816 44. Cole JR, Wang Q, Cardenas E, Fish J, Chai B, Farris RJ, Kulam-Syed-Mohideen AS,  
817 McGarrell DM, Marsh T, Garrity GM, Tiedje JM. 2009. The Ribosomal Database  
818 Project: improved alignments and new tools for rRNA analysis. *Nucleic Acids Res*  
819 37:D141-5.
- 820 45. Pruesse E, Quast C, Knittel K, Fuchs BM, Ludwig WG, Peplies J, Glockner FO. 2007.  
821 SILVA: a comprehensive online resource for quality checked and aligned ribosomal  
822 RNA sequence data compatible with ARB. *Nucleic Acids Research* 35:7188-7196.
- 823 46. Calle ML, Urrea V, Boulesteix AL, Malats N. 2011. AUC-RF: a new strategy for  
824 genomic profiling with random forest. *Hum Hered* 72:121-32.
- 825 47. Langille MGI, Zaneveld J, Caporaso JG, McDonald D, Knights D, Reyes JA, Clemente  
826 JC, Burkepille DE, Thurber RLV, Knight R, Beiko RG, Huttenhower C. 2013. Predictive  
827 functional profiling of microbial communities using 16S rRNA marker gene sequences.  
828 *Nature Biotechnology* 31:814.

829 48. Girvan M, Newman ME. 2002. Community structure in social and biological networks.

830 Proc Natl Acad Sci U S A 99:7821-6.

831

832 Figure Legends

833 **Figure 1** Effects of early supplementary solid diet on rumen fermentation parameters  
834 in goat kids

835 The Anova test was used for significance calculation after detection of homogeneity  
836 of variance. After the global test was significant, a post-hoc analysis (Tukey's HSD  
837 test) was performed to determine which group of the independent variable differ from  
838 each other group. High dietary nitrogen conversion ratio was found in MRC and  
839 MCO ( $P<0.05$ ). The total VFA, acetate propionate and butyrate had the highest values  
840 in MCA ( $P<0.05$ ), and they were significantly higher in MRC than in MRO ( $P<0.05$ ).  
841 MRO=milk replacer only, MRC= milk replacer + concentrate , MCA= milk replacer +  
842 concentrate + alfalfa. VFA: Volatile fatty acids. Statistical significance was accepted  
843 at  $P<0.05$ .

844

845 **Figure 2.** The early supplementary solid diet impacted on Alpha and Beta diversity of  
846 rumen microbiome in goat kids. (A-B) The Shannon Index and Observed species.  
847 Alpha diversity of the rumen microbial data was tested using Kruskal-Wallis test and  
848 a post-hoc Dunn Kruskal-Wallis multiple comparison with Bonferroni method for p  
849 value correction. Principal coordinate analysis (PCoA) of the community membership  
850 based on the weighted (C) and unweighted (D) UniFrac distance, with the green  
851 cycles as MRO, red cycles as MRC and blue cycles as MCA.

852 Although diversity (Shannon index) was not different ( $p=0.372$ ), significance of  
853 microbial richness was observed among MRO, MRC and MCA rumen samples



854 (p=0.012). Significances in community structure among 3 group were detected  
855 (Weighted Unifrac ANOSIM, R=0.68, P<0.05; UnWeighted Unifrac ANOSIM,  
856 R=0.69, P=0.001). The MRO formed a distinct cluster in on the left side, while the  
857 MRC and MCA were closely clustered on the right side of PCoA plot.  
858 MRO=milk replacer; MRC= milk replacer + concentrate; MCA= milk replacer +  
859 concentrate + alfalfa; ANOSIM: Analysis of similarity

860

861 **Figure 3** The top 30 OTUs in 3 supplementary regimes. Each bar shows the average  
862 relative abundance of MRO, MRC and MCA. Each color represents the relative  
863 abundance of a bacterial taxon on the stacked bar chart.

864 MRO=milk replacer, MRC= milk replacer + concentrate, MCA= milk replacer +  
865 concentrate + alfalfa.

866

867 **Figure 4.** The highlight signature microbiota identified by AUCRF for differentiating  
868 MRO, MRC and MCA

869 All the OTUs abundances were tested using Kruskal–Wallis test and a post-hoc Dunn  
870 Kruskal-Wallis multiple comparison with Bonferroni method for p value correction.

871 The black dots within each bar were values from individual animal, and the black  
872 lines within each bar represented the medians.

873 MRO=milk replacer; MRC= milk replacer + concentrate; MCA= milk replacer +  
874 concentrate + alfalfa; AUCRF: RandomForest based on optimizing the area-under-the

875 receiver operator characteristic curve (AUC);

876

877 **Figure 5** Correlation analysis between nutrient (CP, NFC and NDF) intake and rumen  
878 microbes in goat kids.

879 We performed the RandomForest regression model across all samples between dietary  
880 average daily CP, NFC and NDF intake and all the genera with high prediction  
881 accuracy (Table S6). Then, using the abundances of top 50 features to calculate the  
882 pearson correlation with intake of CP, NFC and NDF was carried out. We consider  
883  $p < 0.05$  as a significant correlation and yellow crosses indicated non-significant. The  
884 Pearson coefficients were labeled black values inside cycles, red dots represented  
885 negative correlation, and blue dots indicated a positive correlation. The bacteria from  
886 up to bottom followed the descending order of mean square error.

887 CP: Crude protein average daily intake; NDF: Neutral detergent fibers average daily  
888 intake; NFC: Non-fibrous carbohydrates average daily intake.

889

890 **Figure 6** Comparing taxon-level contribution profiles of functional shifts: A: MRO  
891 control and MRC case, B: MRO control and MCA case.

892 Taxon-level shift contribution profiles for case-associated functional modules by  
893 FishTaco. The horizontal axis represents rank and statistic scores, and the vertical axis  
894 represents related pathways. For each functional pathway, the bar on the top-right of Y  
895 axis represents case-associated bacteria driving the enrichment in the functional  
896 module; the bar on the top-left of Y axis indicates case-associated bacteria attenuating  
897 functional shift; the bar on the bottom-right of Y axis represents bacteria depleted in

898 control driving functional shift; the bar on the bottom-left of Y axis shows bacteria  
899 depleted in control attenuating functional shift. White diamonds represent  
900 bacterial-based functional shift scores.

901 The abundances of main drivers were displayed on the right side. OTU2 and OTU3,  
902 the shared drivers of enrichments of MRC and MCA were abundant in solid diet  
903 regimes. OTU1 enriched in MRO was strongly depleted by solid diets. OTU11, OTU7  
904 and OTU13, driving mainly MCA function shifts, increased abundance with  
905 supplementation of solid diet.

906 FishTaco:Functional Shifts' Taxonomic Contributors; MRO=milk replacer; MRC=  
907 milk replacer + concentrate, MCA= milk replacer + concentrate + alfalfa;

908

909 **Figure 7** Network analysis of the interactions between bacterial taxa at MRO (A),  
910 MRC (B) and MCA (C).

911 The OTUs accounting for >0.5% of the total sequences were selected to network  
912 analysis. Each node denotes a particular OTU within the network and each line (edge)  
913 a significant co-efficiency relationship (Pearson rank correlation coefficient >0.6 or  
914 <-0.6. The table under corresponding figures contained the highlight OTUs and their  
915 sequence identifiers with the highest scores from NCBI database (other OTUs  
916 identifiers were shown in File S4).

917 MRO=milk replacer; MRC= milk replacer + concentrate; MCA= milk replacer +  
918 concentrate + alfalfa;

919

920 legend for supplemental materials

921

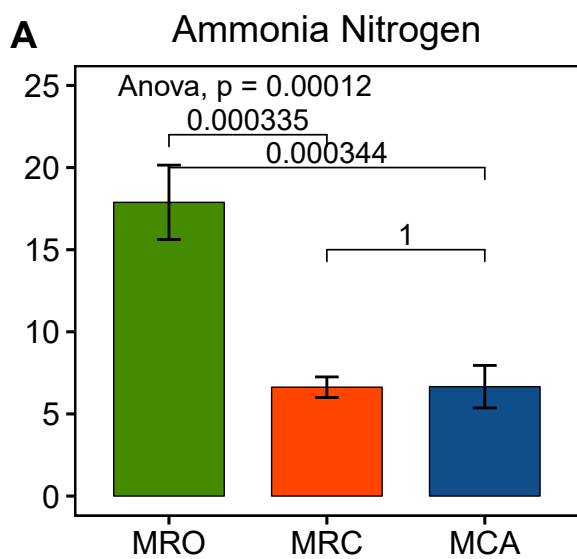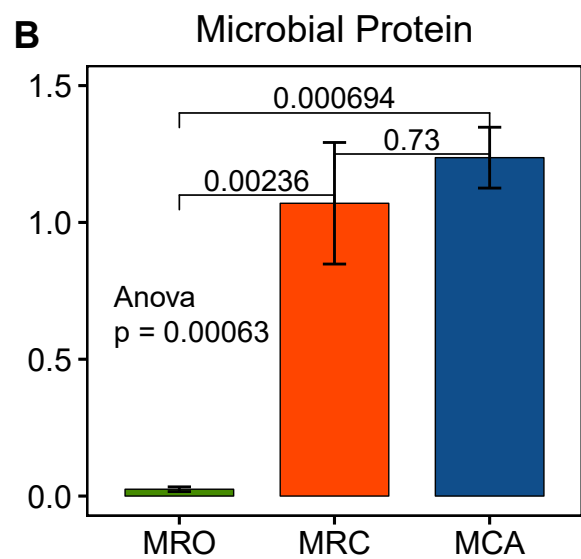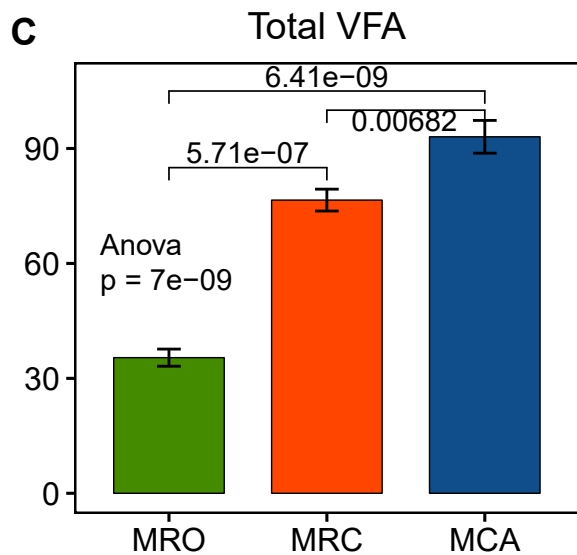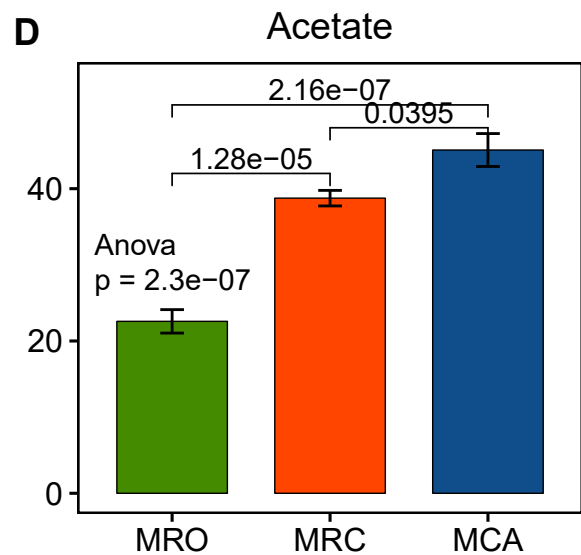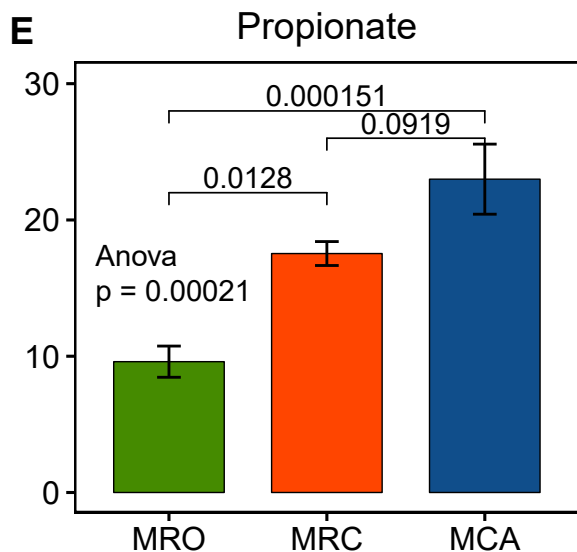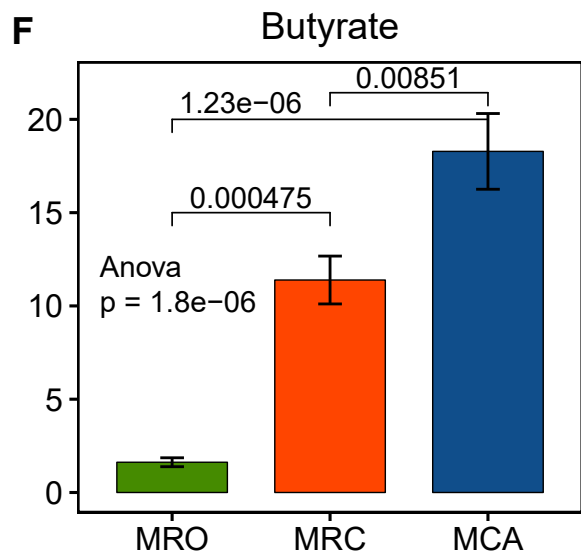

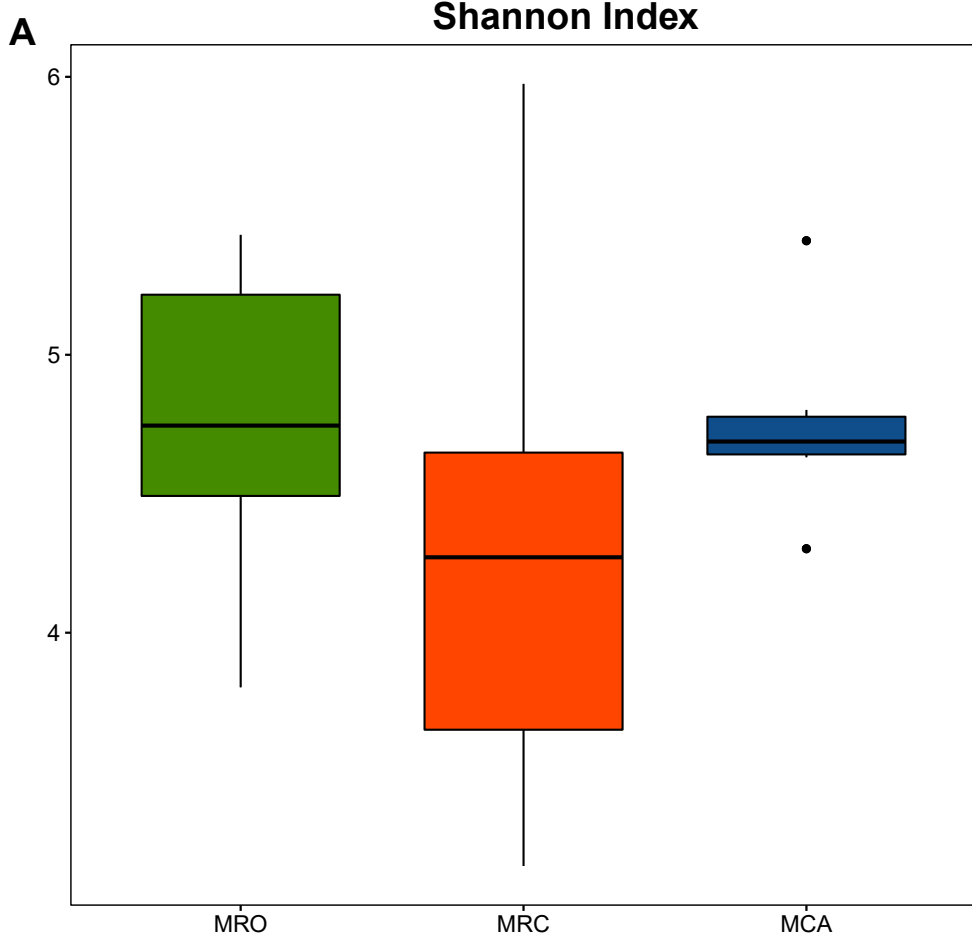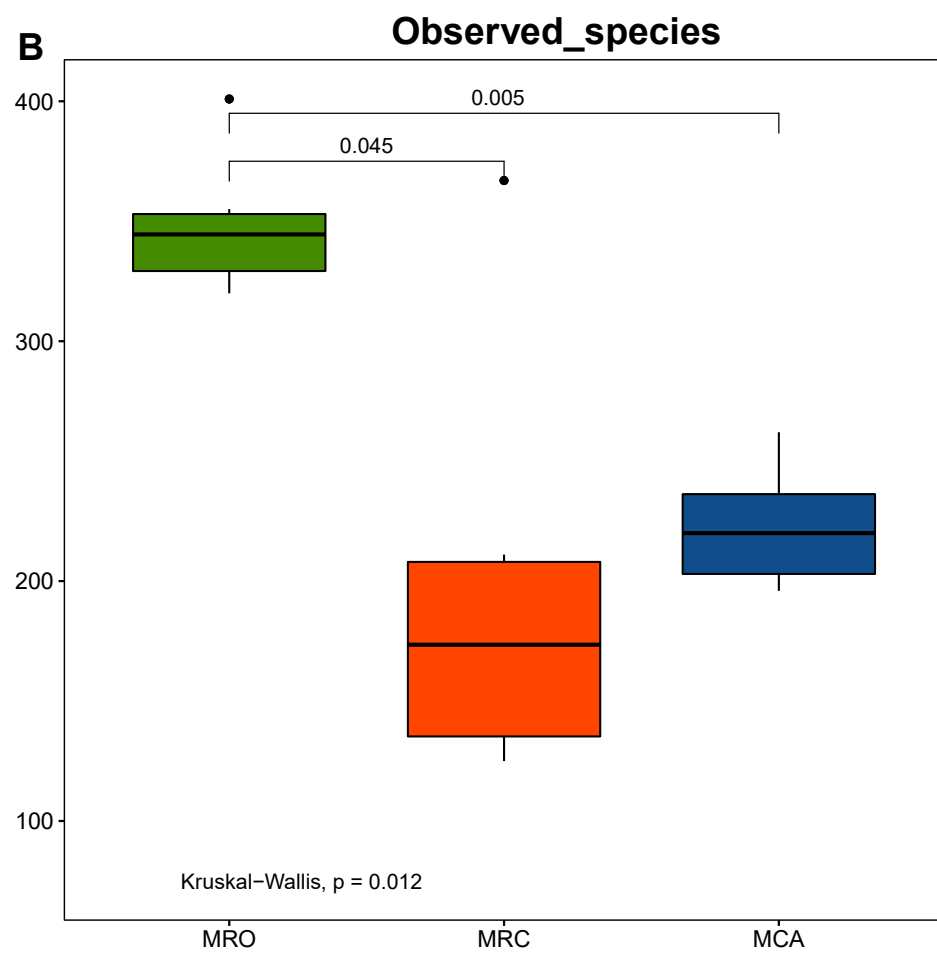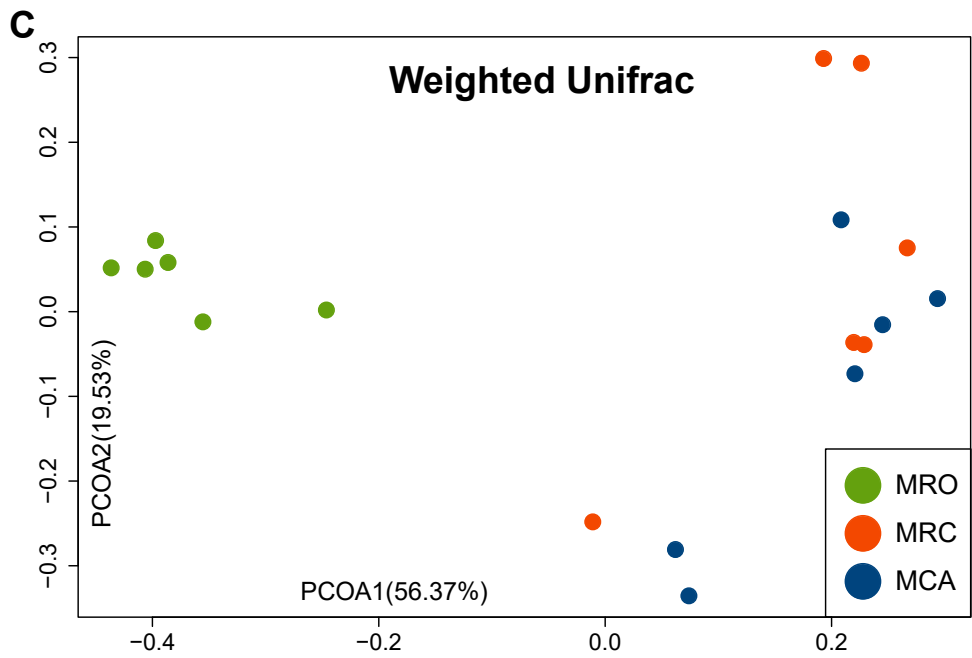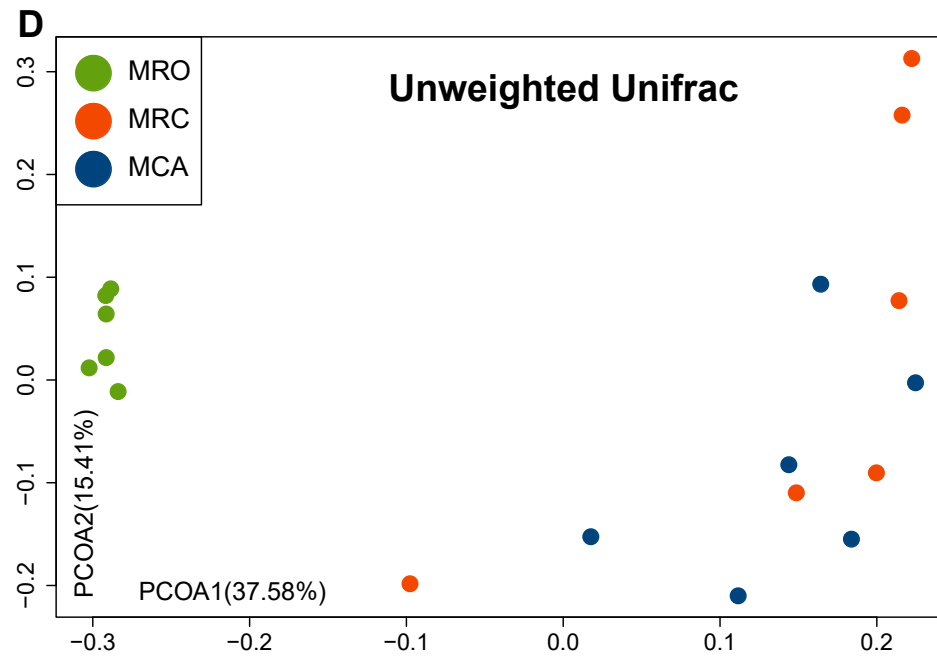

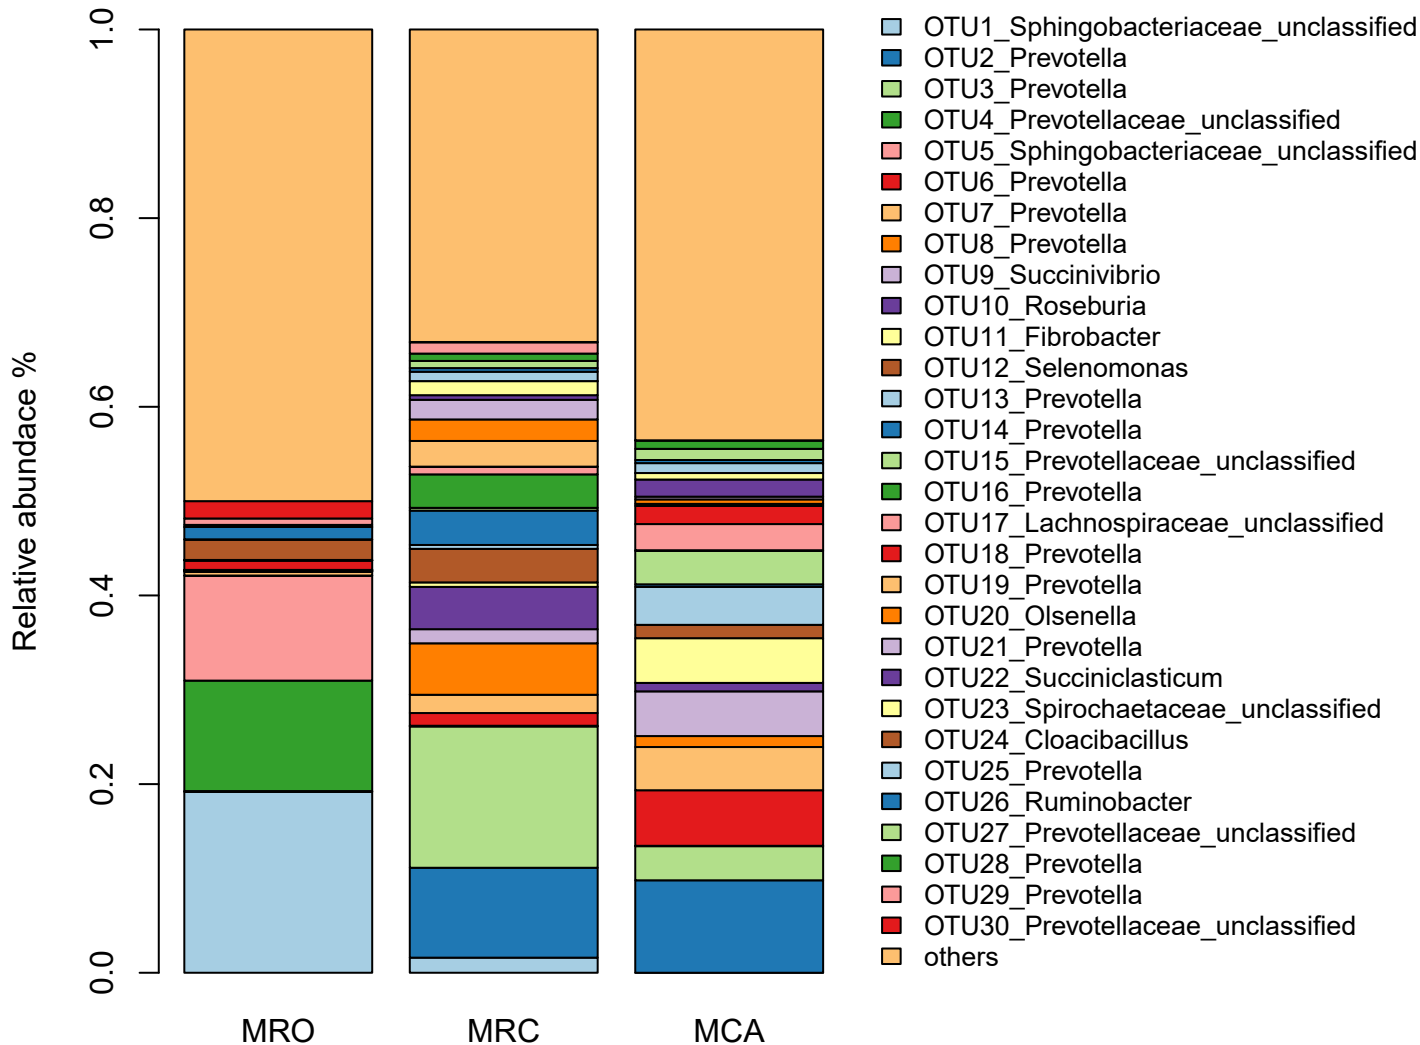

**A** OTU5\_Sphingobacteriaceae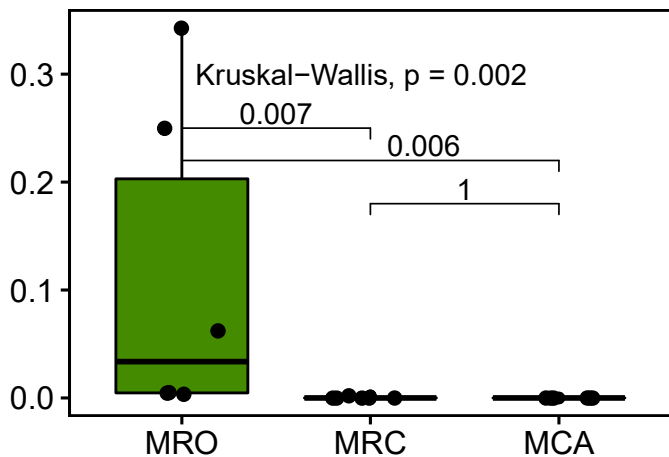**B** OTU24\_Cloacibacillus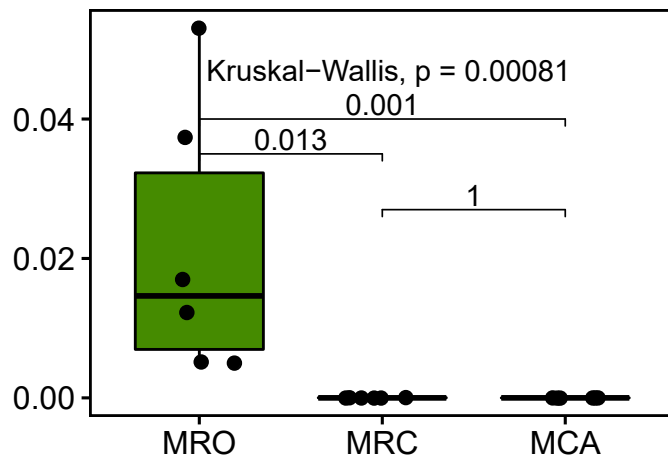**C** OTU6\_Prevotella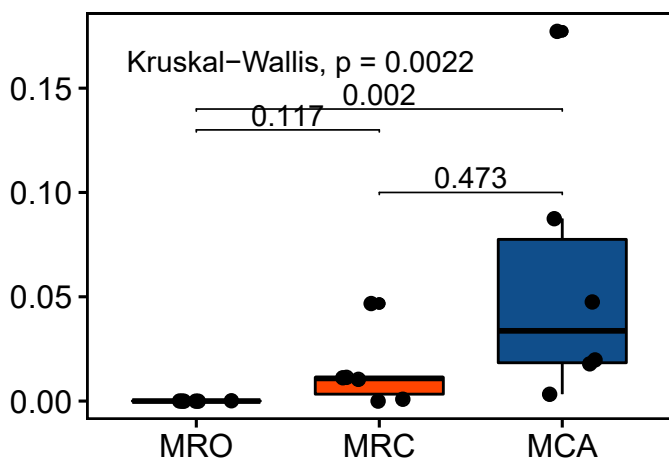**D** OTU148\_Lachnospiraceae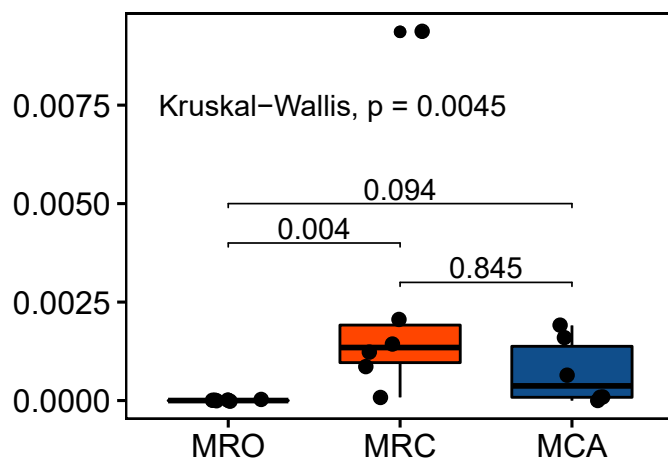**E** OTU87\_Butyrvibrio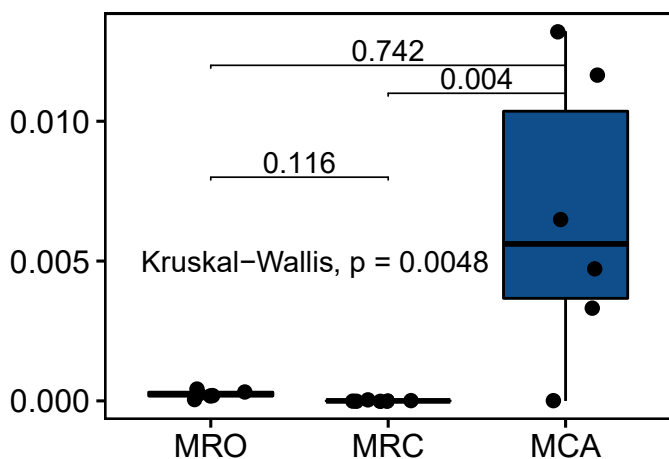**F** OTU83\_Bacteroidales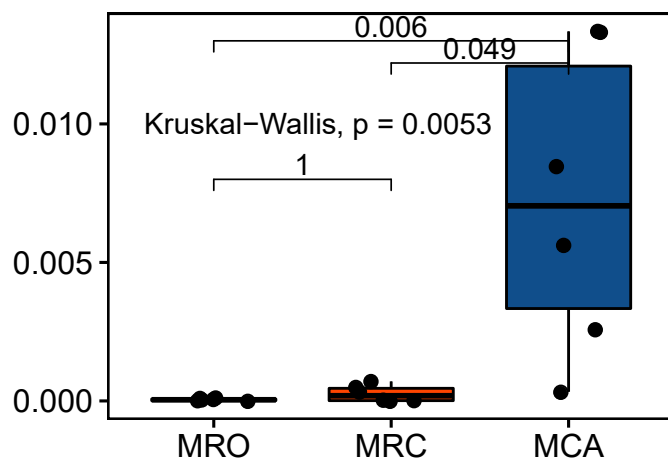



**A CP**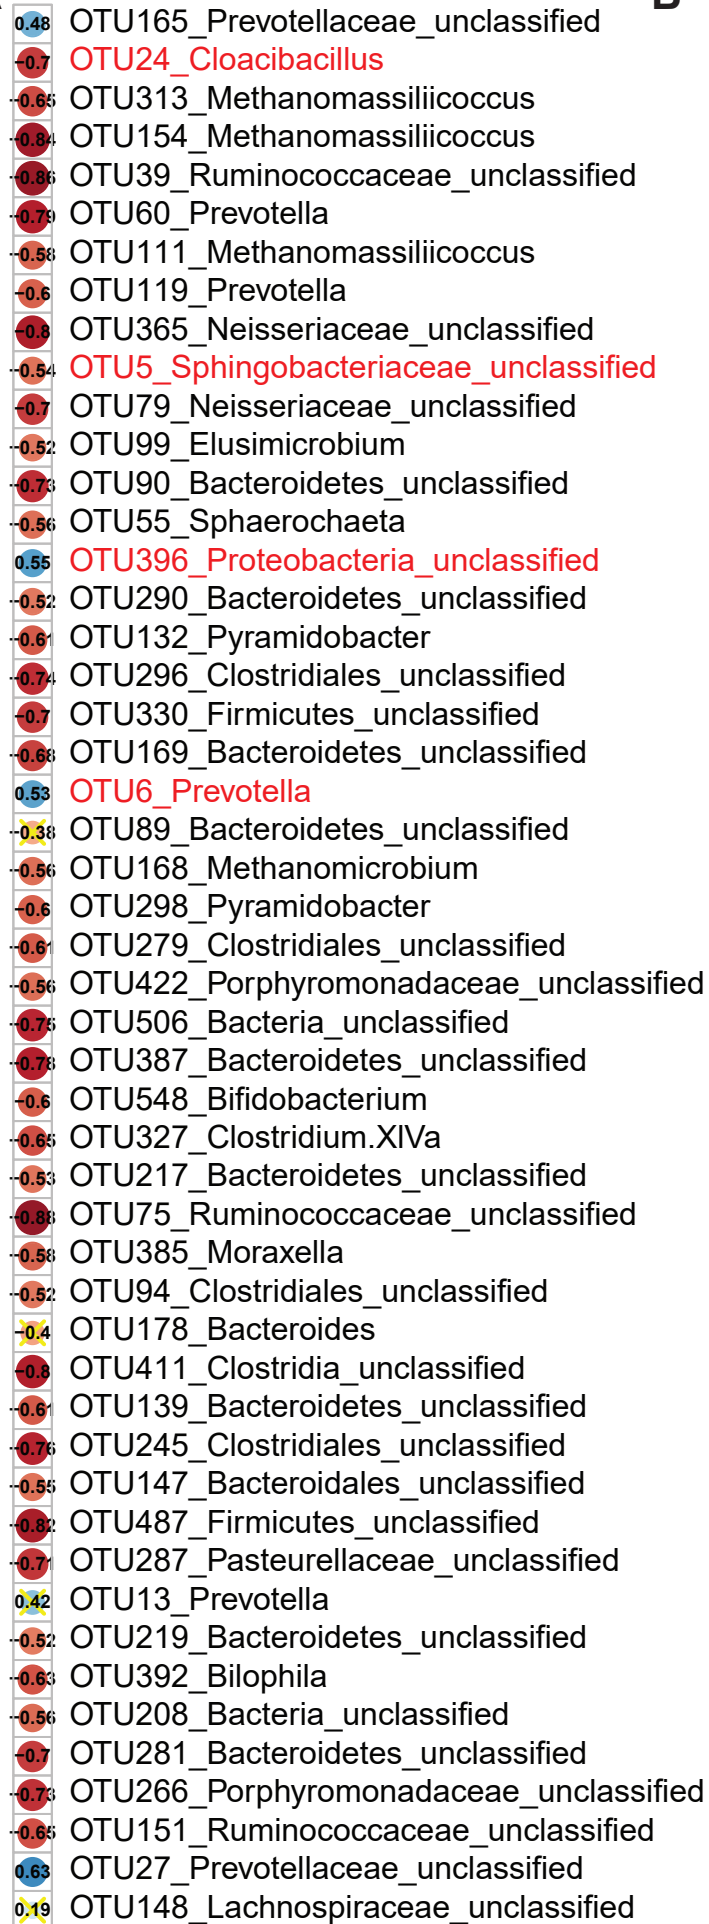**B NFC**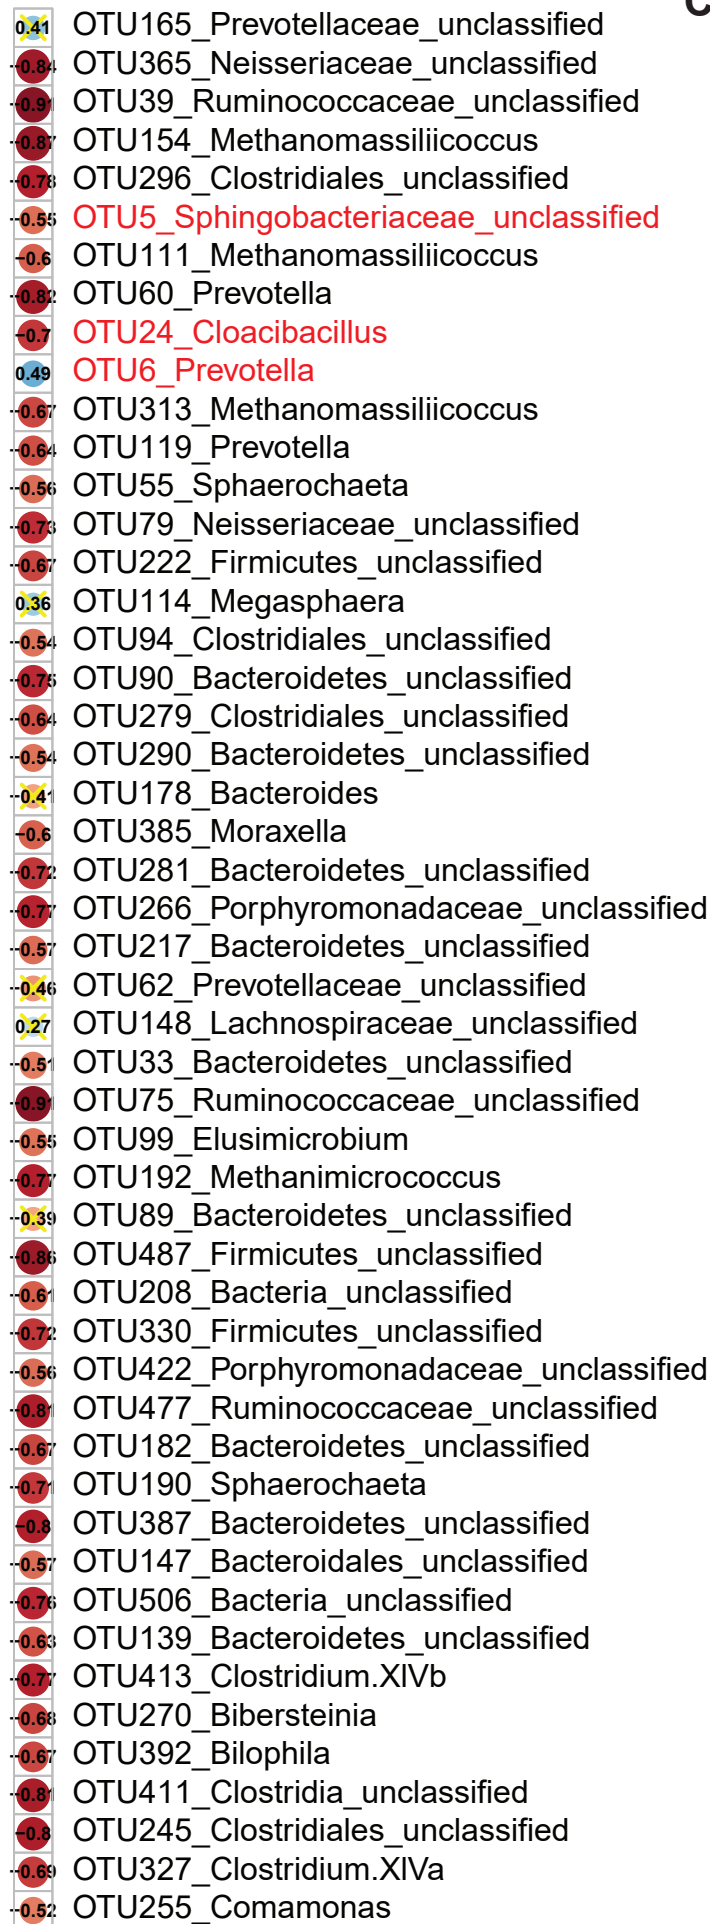**C NDF**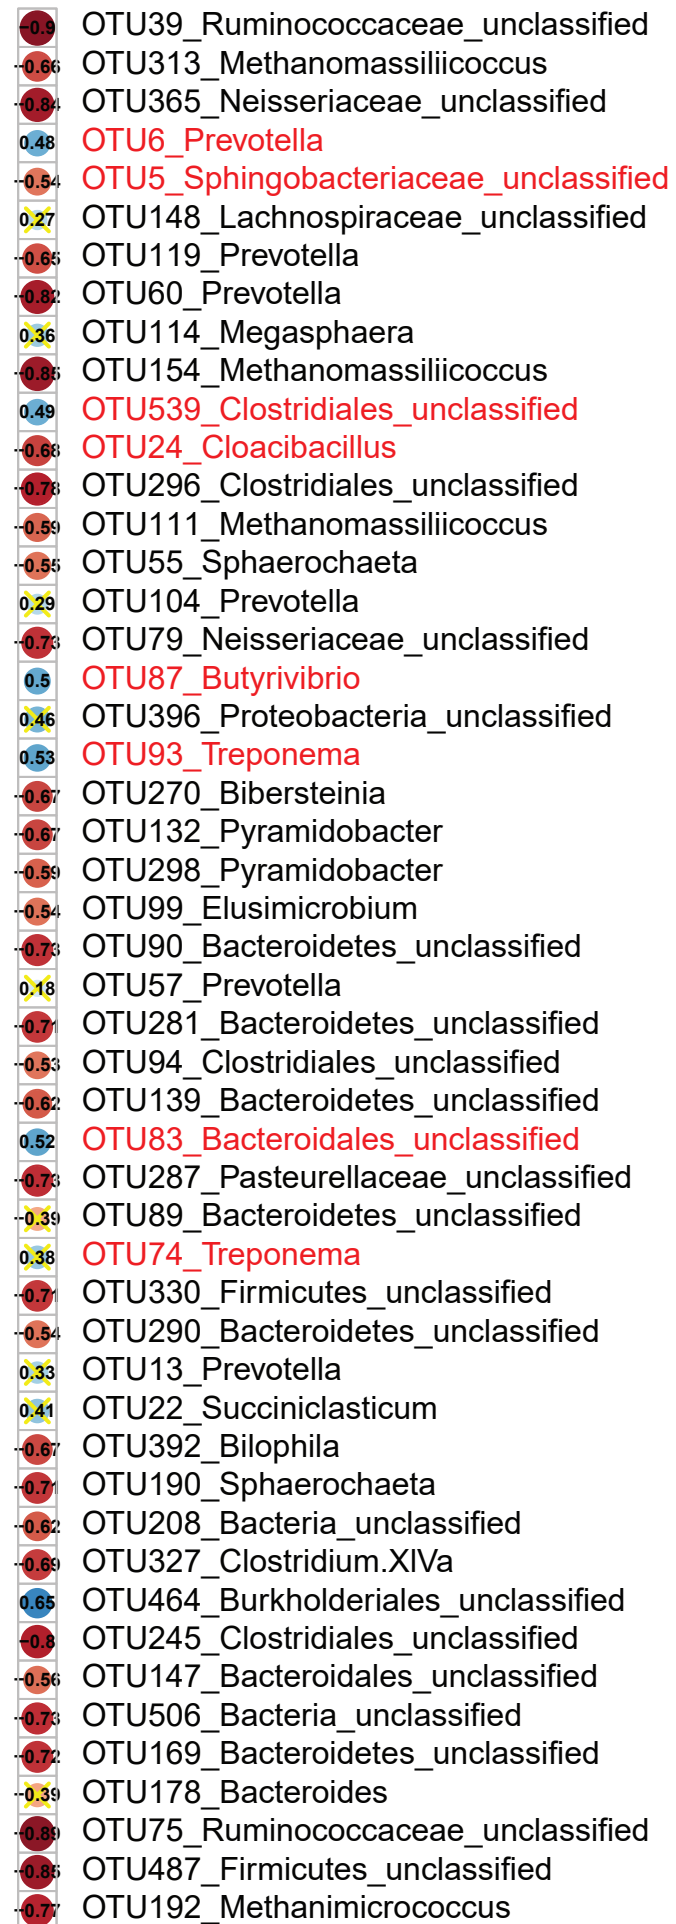

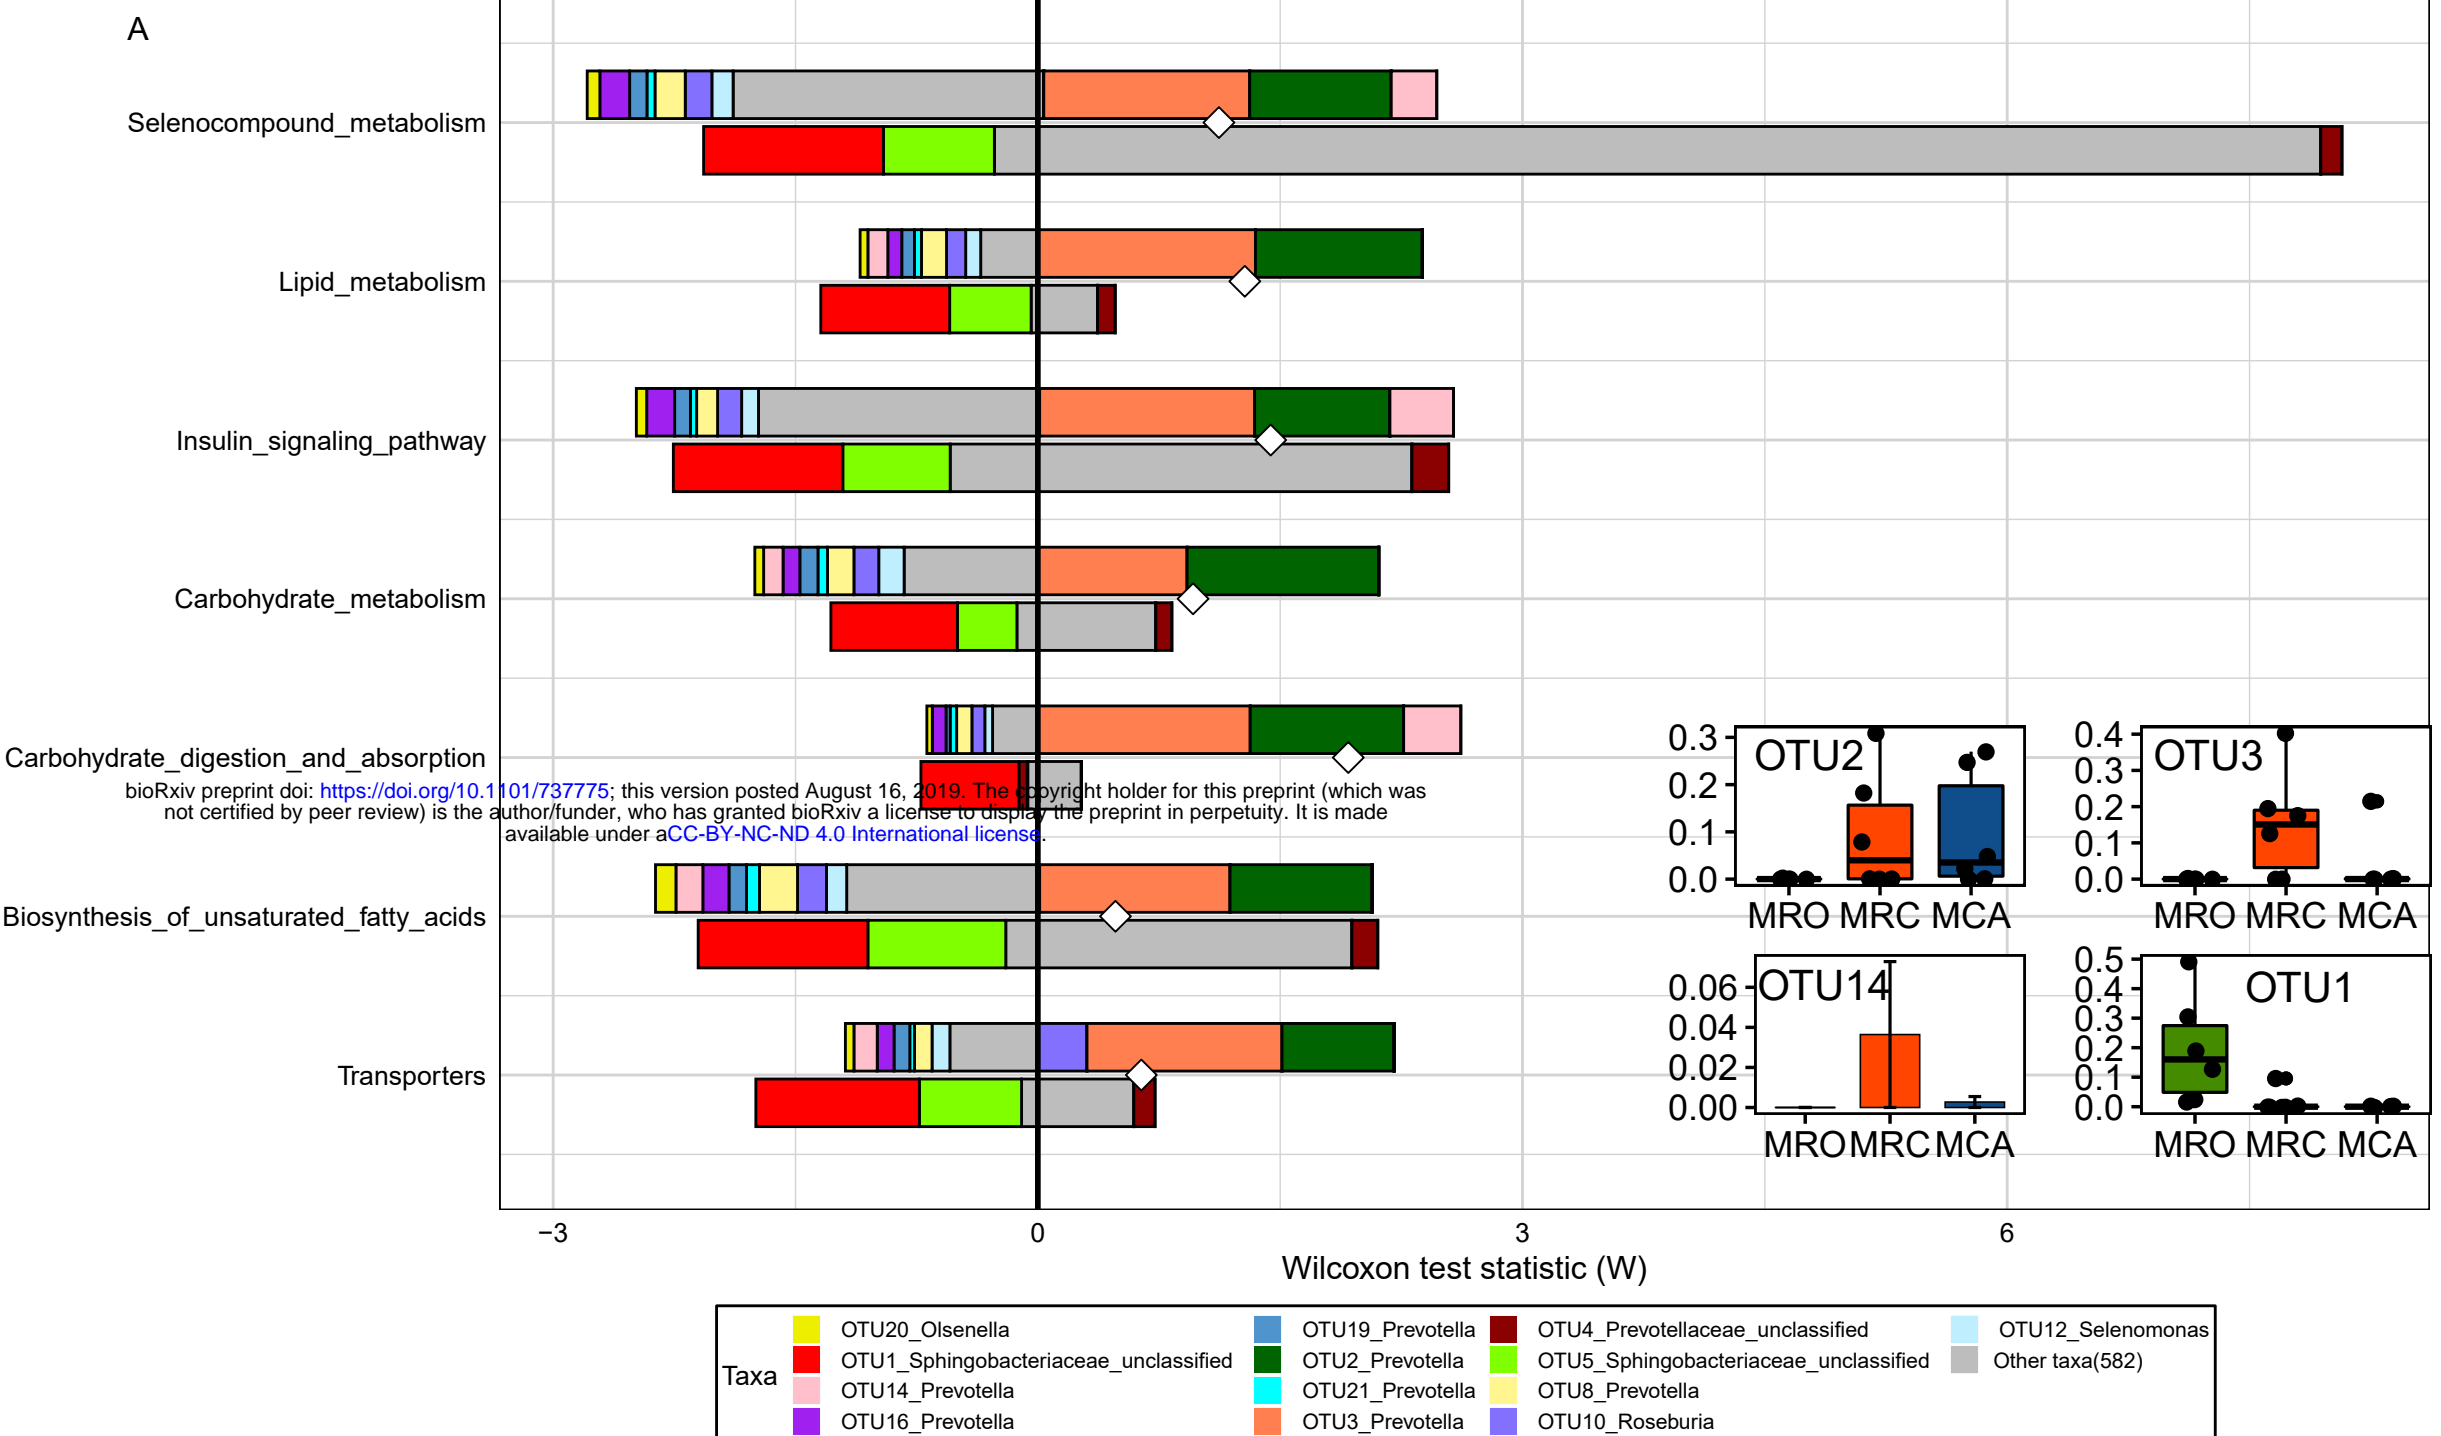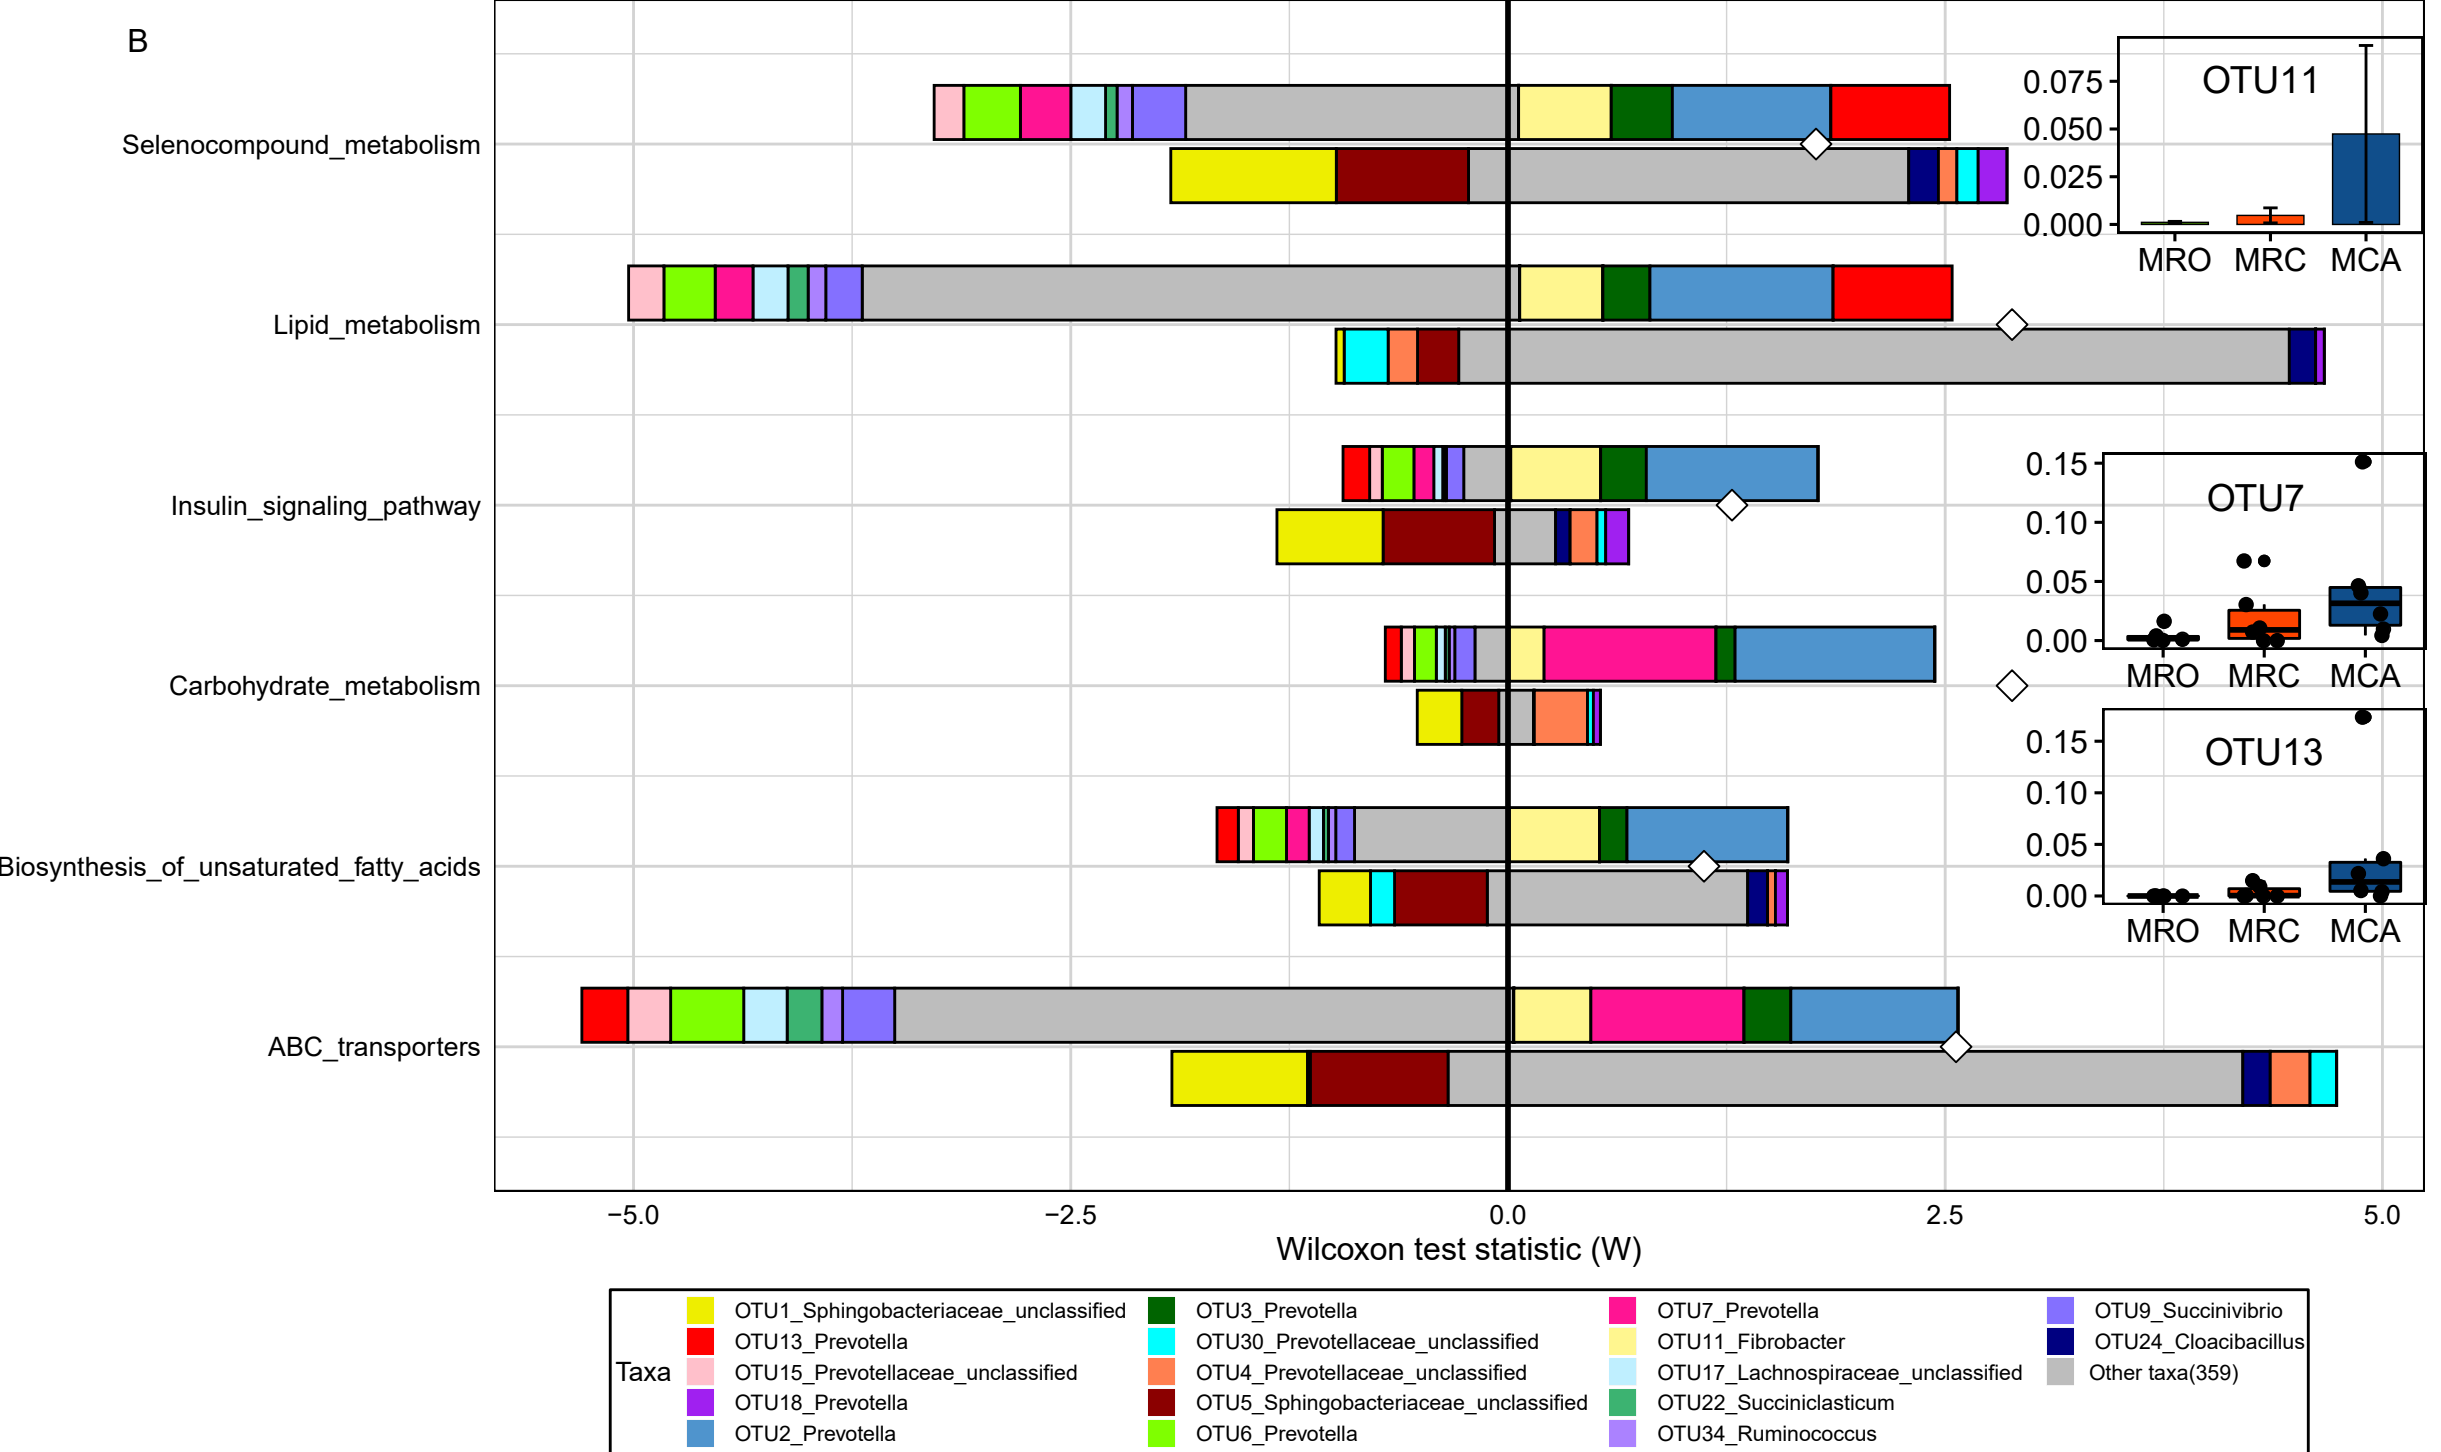

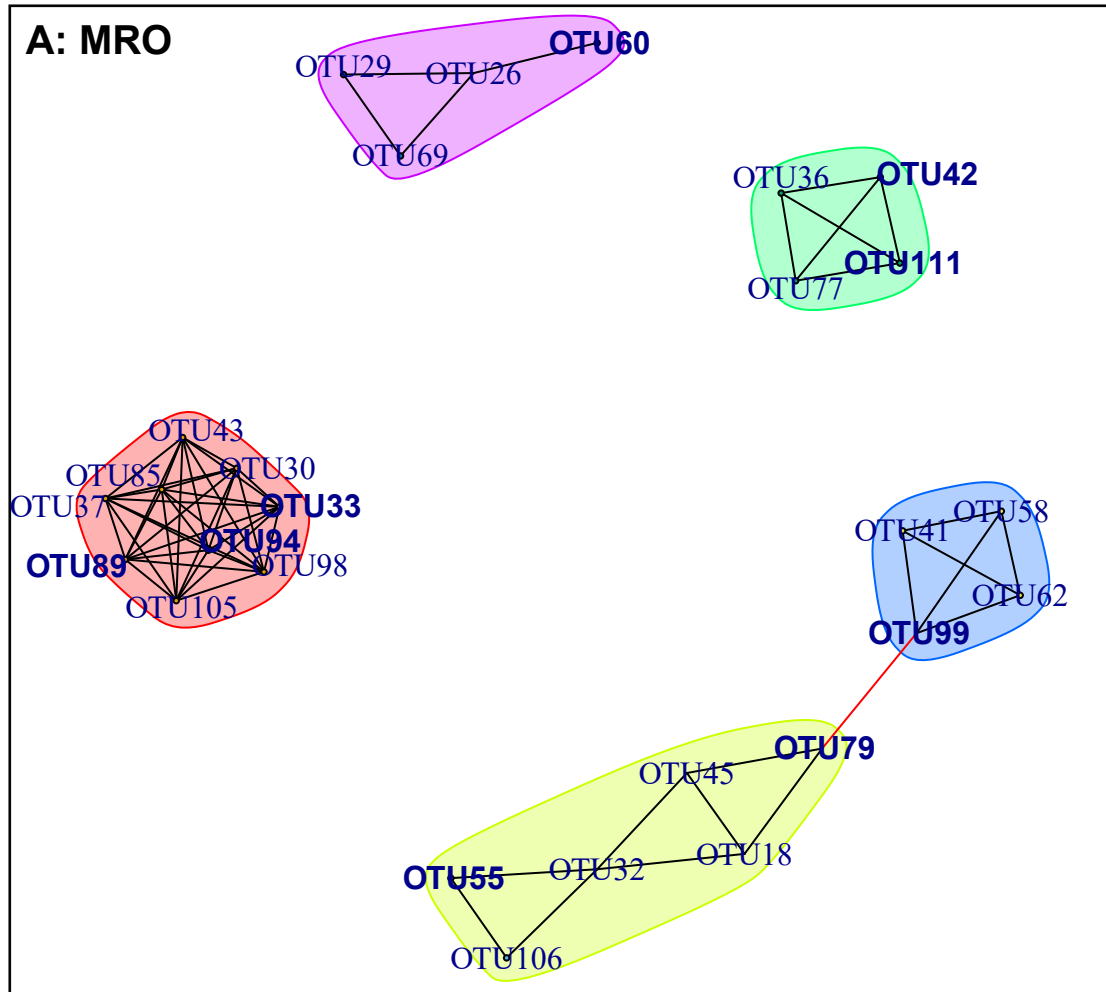

|                                  |                                   |
|----------------------------------|-----------------------------------|
| OTU60_Prevotella                 | Prevotella oralis                 |
| OTU42_Prevotella                 | Prevotella shahii                 |
| OTU111_Methanomassiliicoccus     | Methanomassiliicoccus luminyensis |
| OTU99_Elusimicrobium             | Elusimicrobium minutum            |
| OTU79_Neisseriaceae_unclassified | Snodgrassella alvi                |
| OTU55_Sphaerochaeta              | Sphaerochaeta pleomorpha          |
| OTU33_Bacteroidetes_unclassified | Porphyromonas pogonae             |
| OTU94_Clostridiales_unclassified | Christensenella minuta            |
| OTU89_Bacteroidetes_unclassified | Schleiferia thermophila           |

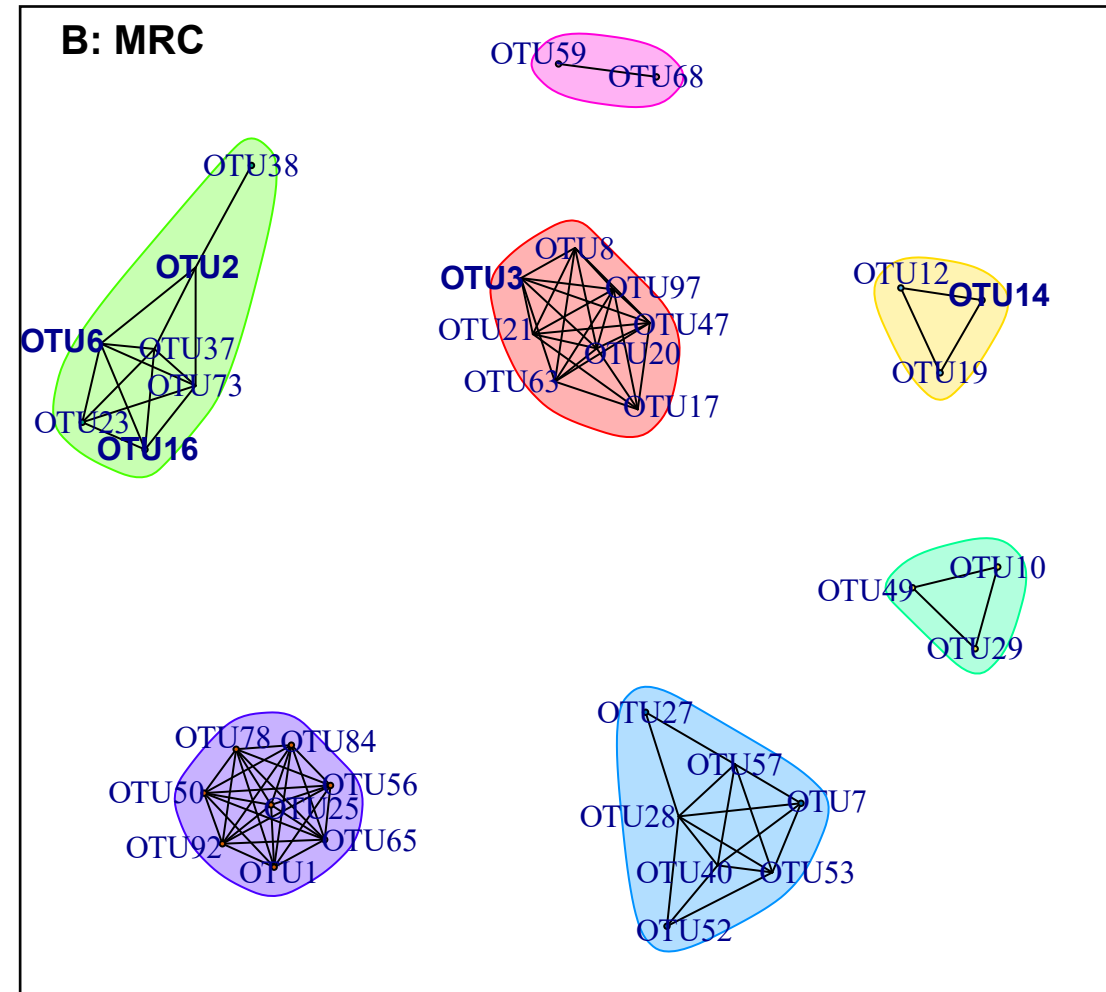

|                  |                       |
|------------------|-----------------------|
| OTU2_Prevotella  | Prevotella brevis     |
| OTU6_Prevotella  | Prevotella oralis     |
| OTU16_Prevotella | Prevotella ruminicola |
| OTU3_Prevotella  | Prevotella copri      |
| OTU14_Prevotella | Prevotella histicola  |

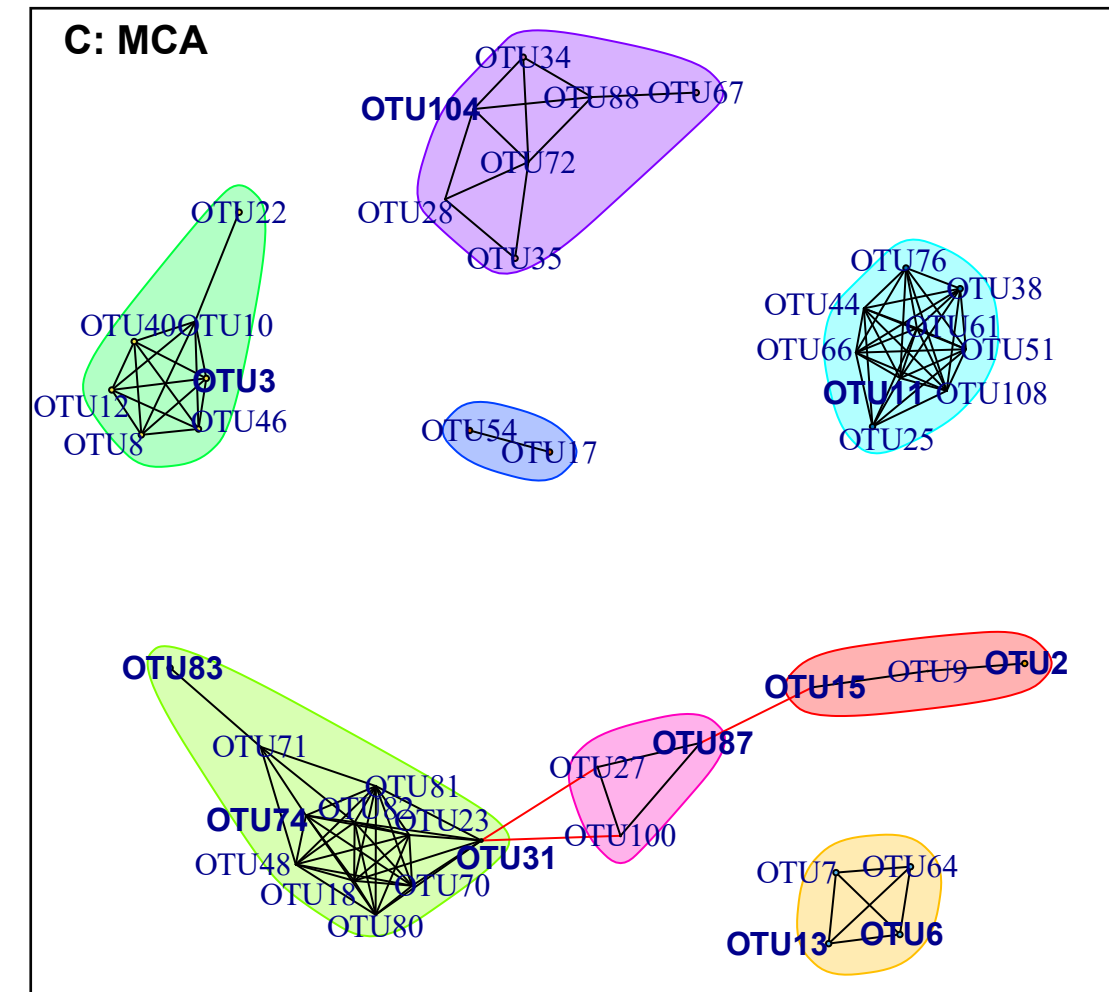

|                                   |                               |
|-----------------------------------|-------------------------------|
| OTU104_Prevotella                 | Prevotella ruminicola         |
| OTU11_Fibrobacter                 | Fibrobacter succinogenes      |
| OTU2_Prevotella                   | Prevotella brevis             |
| OTU6_Prevotella                   | Prevotella oralis             |
| OTU13_Prevotella                  | Prevotella brevis             |
| OTU87_Butyrivibrio                | Butyrivibrio hungatei         |
| OTU74_Treponema                   | Treponema bryantii            |
| OTU83_Bacteroidales_unclassified  | Prevotellamassilia timonensis |
| OTU3_Prevotella                   | Prevotella copri              |
| OTU15_Prevotellaceae_unclassified | Metaprevotella massiliensis   |
| OTU31_Fibrobacter                 | Fibrobacter succinogenes      |
